# Supplementary material for: Beyond Social Deficits:Personal Agency and Social Connection Shape Loneliness Over Time
Source: Research Square preprint supplement (doi:10.21203/rs.3.rs-6099787/v1), 2025-03-26
Supplement: Supplementary file 1 [file b9eb842b4bf3a1d6c4c7c7fe.docx]

Supplemental Materials

TILDA Samples

This study utilized data from TILDA (The Irish Longitudinal Study on Aging), conducted between October 2009 and February 2018, which began with a nationally representative sample of 8,175 individuals and 329 spouses (3,780 male; 4,724 female) aged 50 years and older (range 49-80; M = 62.97, SD = 9.407). Data collection involved home interviews (62% completion rate) and surveys (84% completion rate), gathering comprehensive information about participants' economic circumstances, health, social relationships, employment, demographics, and psychosocial variables. Subsequent wave sample sizes were: W2 = 7206; W3= 6572; W4=5856; and W5=4980.

Listwise cluster results

Table 1: Data represents four clusters across Waves 2-5, showing sample sizes (n) and standardized scores (z) for Communion and Agency dimensions.

| Cluster | Wave | n | Communion (z) | Agency (z) |
| --- | --- | --- | --- | --- |
| Prototype 1 (Separated) | 2 | 860 | -0.65 | 0.25 |
|  | 3 | 717 | -0.63 | 0.45 |
|  | 4 | 635 | -0.58 | 0.40 |
|  | 5 | 572 | -0.74 | 0.07 |
| Prototype 2 (Neglected) | 2 | 478 | -1.45 | -1.38 |
|  | 3 | 337 | -1.59 | -1.28 |
|  | 4 | 372 | -1.47 | -1.26 |
|  | 5 | 270 | -1.42 | -1.45 |
| Prototype 3 (Muted) | 2 | 829 | 0.39 | -0.68 |
|  | 3 | 743 | 0.22 | -0.76 |
|  | 4 | 606 | 0.30 | -0.71 |
|  | 5 | 540 | 0.57 | -0.50 |
| Prototype 4 (Empowered) | 2 | 1133 | 0.82 | 0.90 |
|  | 3 | 930 | 0.89 | 0.86 |
|  | 4 | 830 | 0.88 | 0.89 |
|  | 5 | 682 | 0.69 | 1.03 |

Panel 1: Sankey diagrams illustrating change in prototype membership across waves.


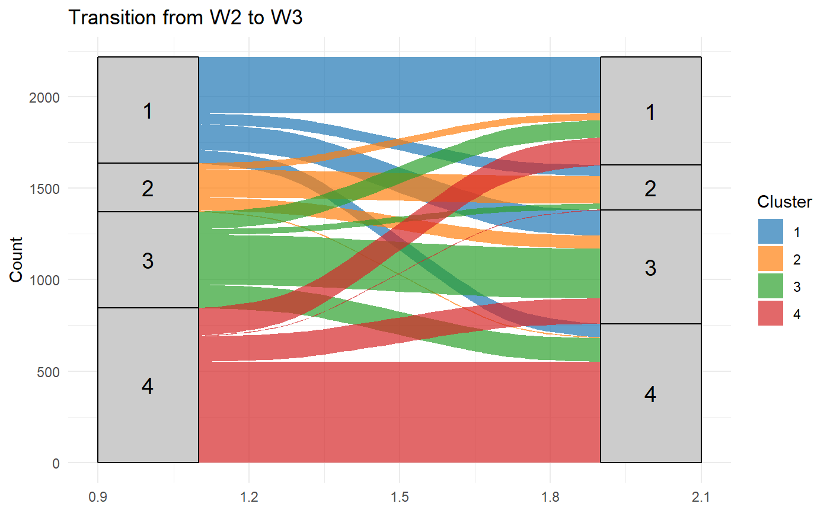


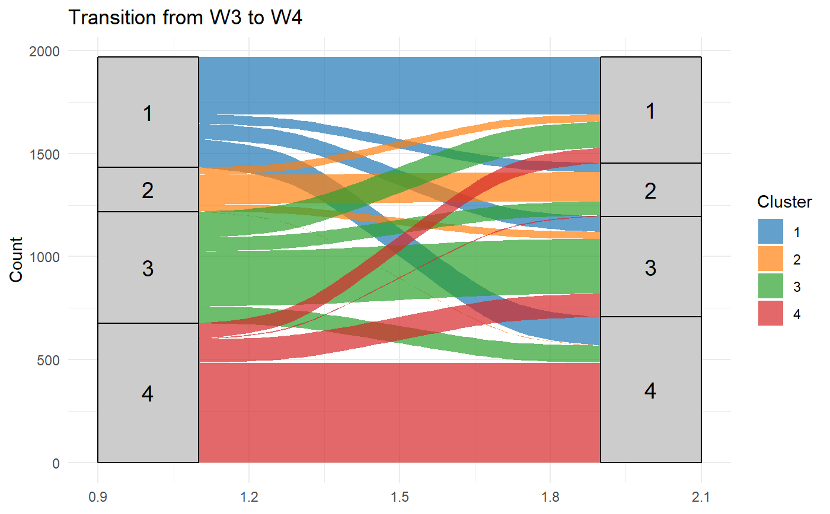


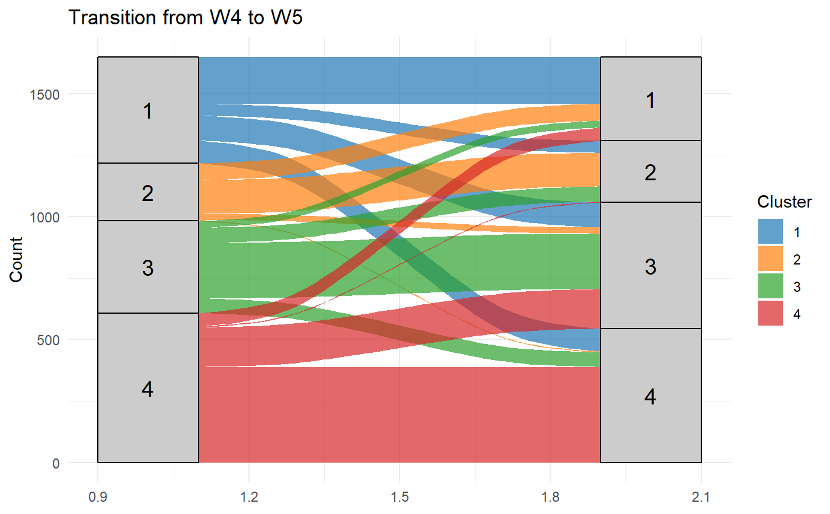


Correlations among variables for each data wave

Wave 2 Correlation Table


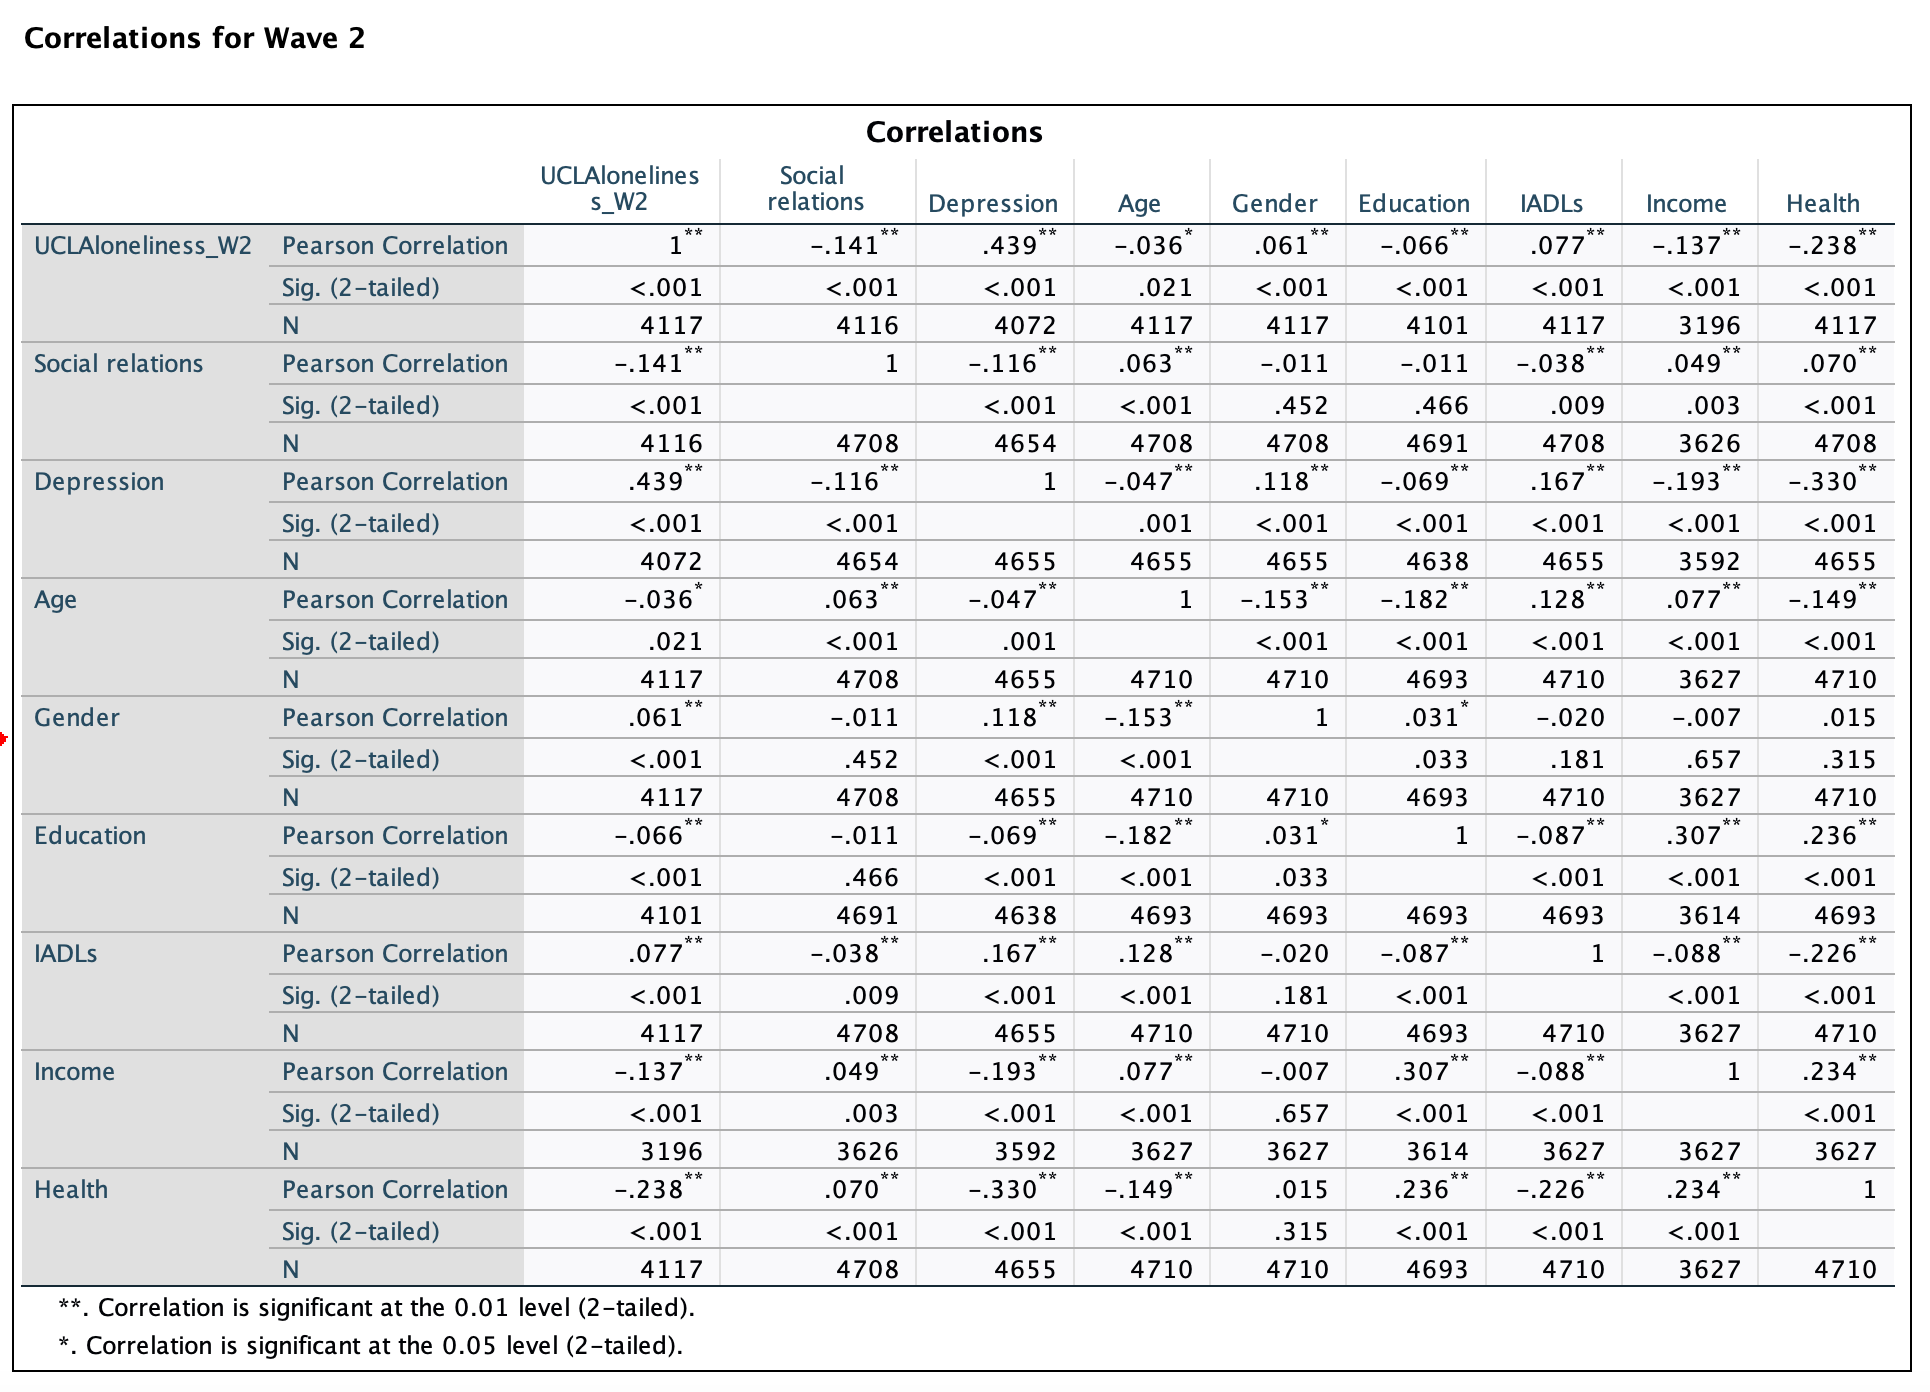


Wave 3 Correlation Table
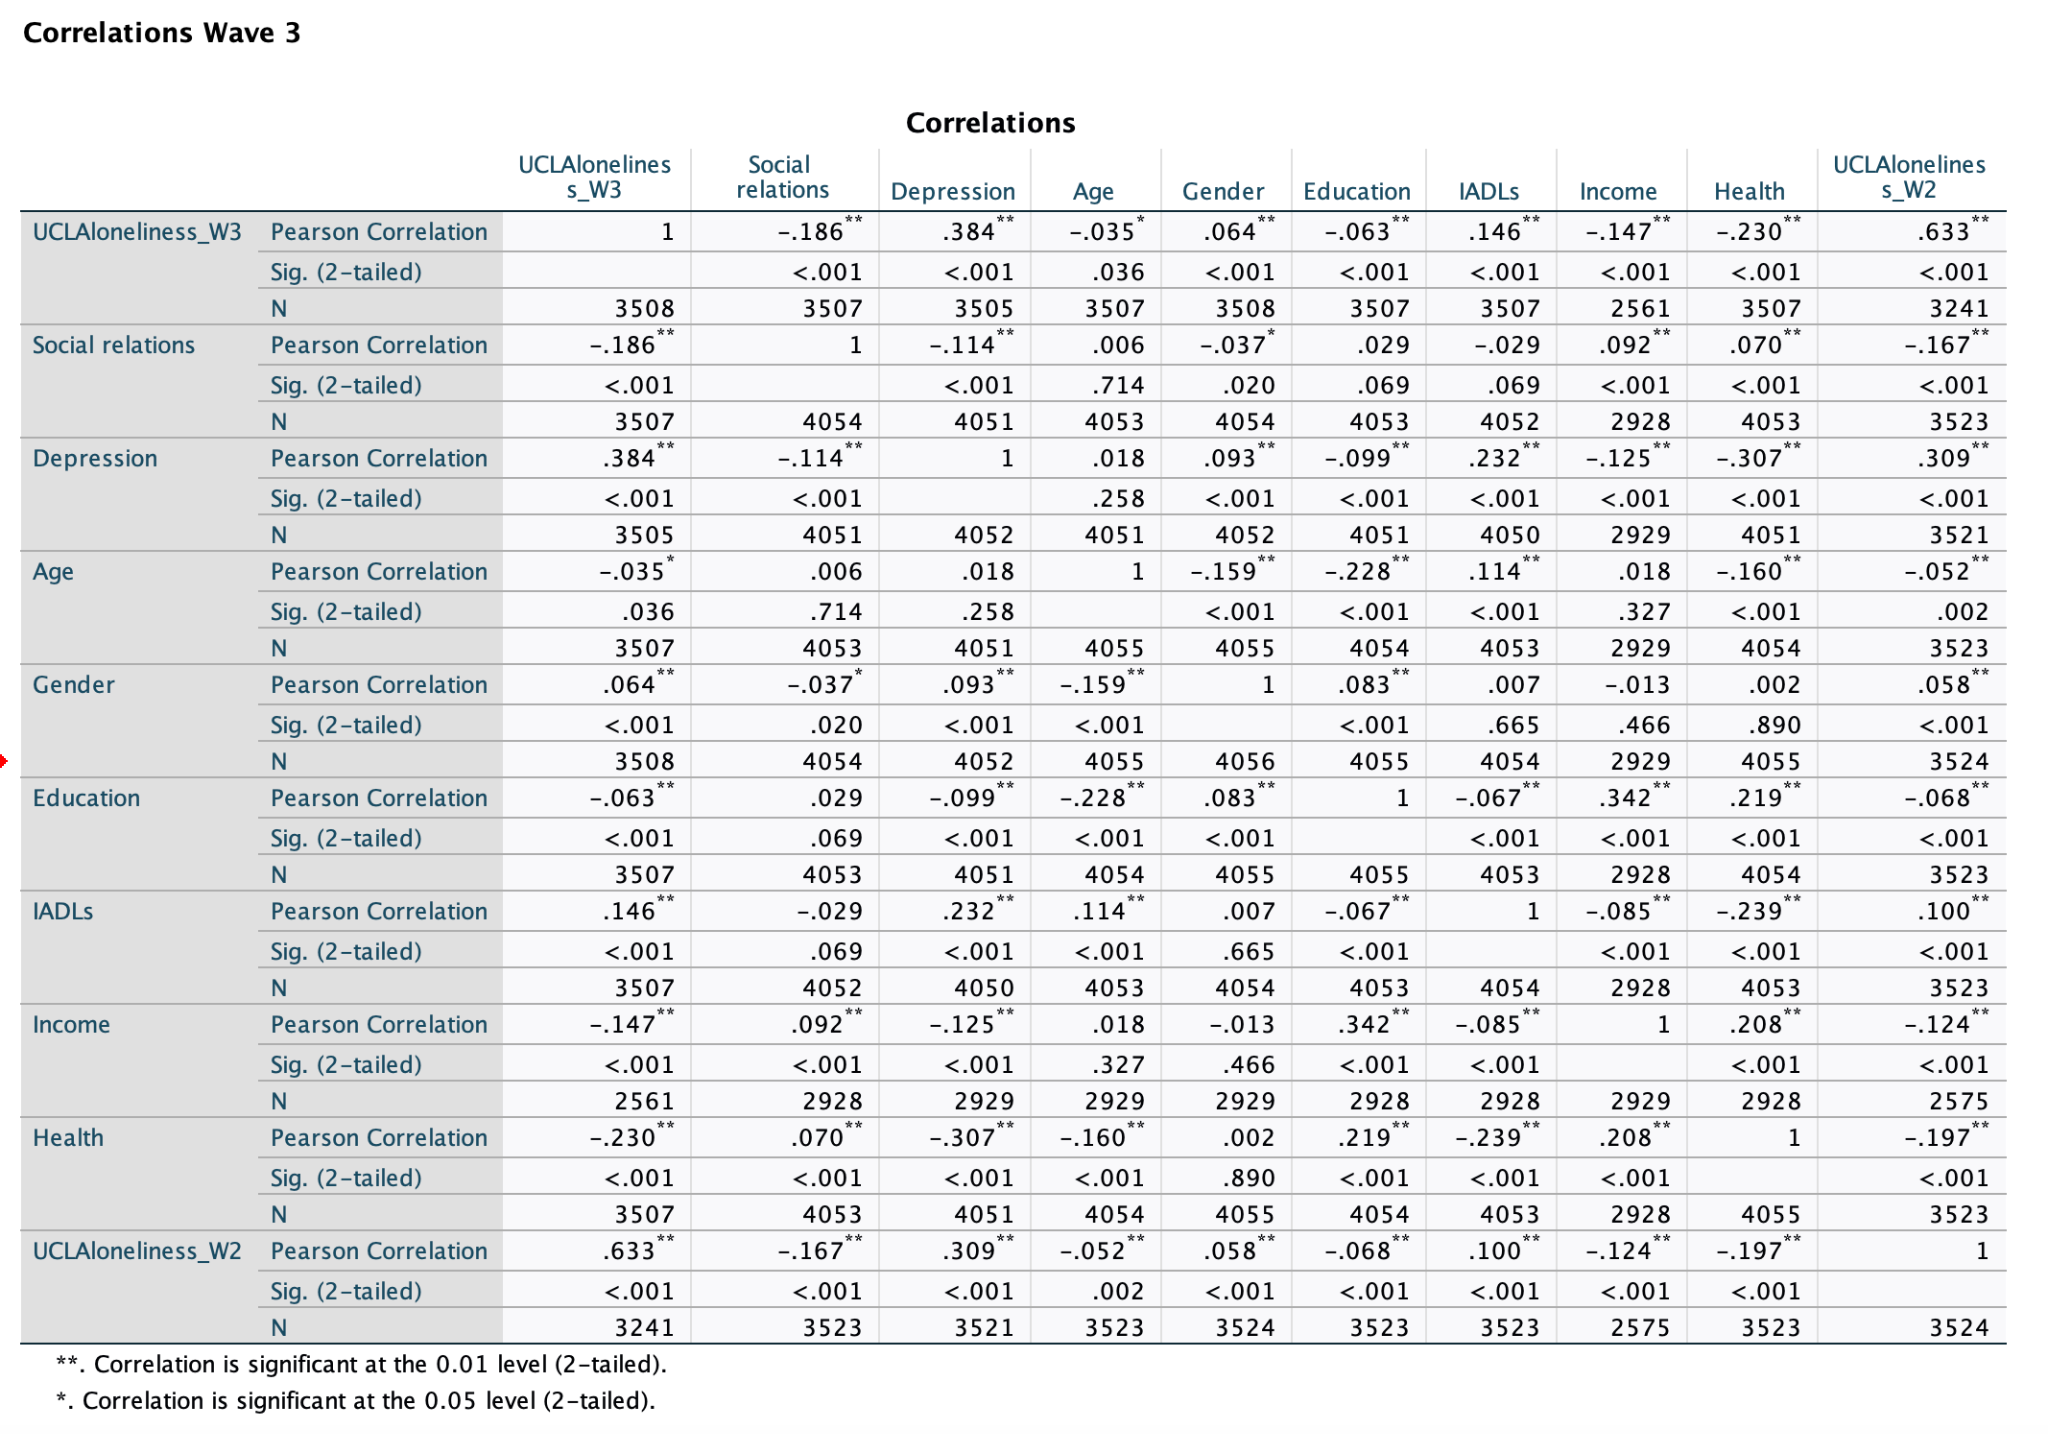


Wave 4 Correlation Table


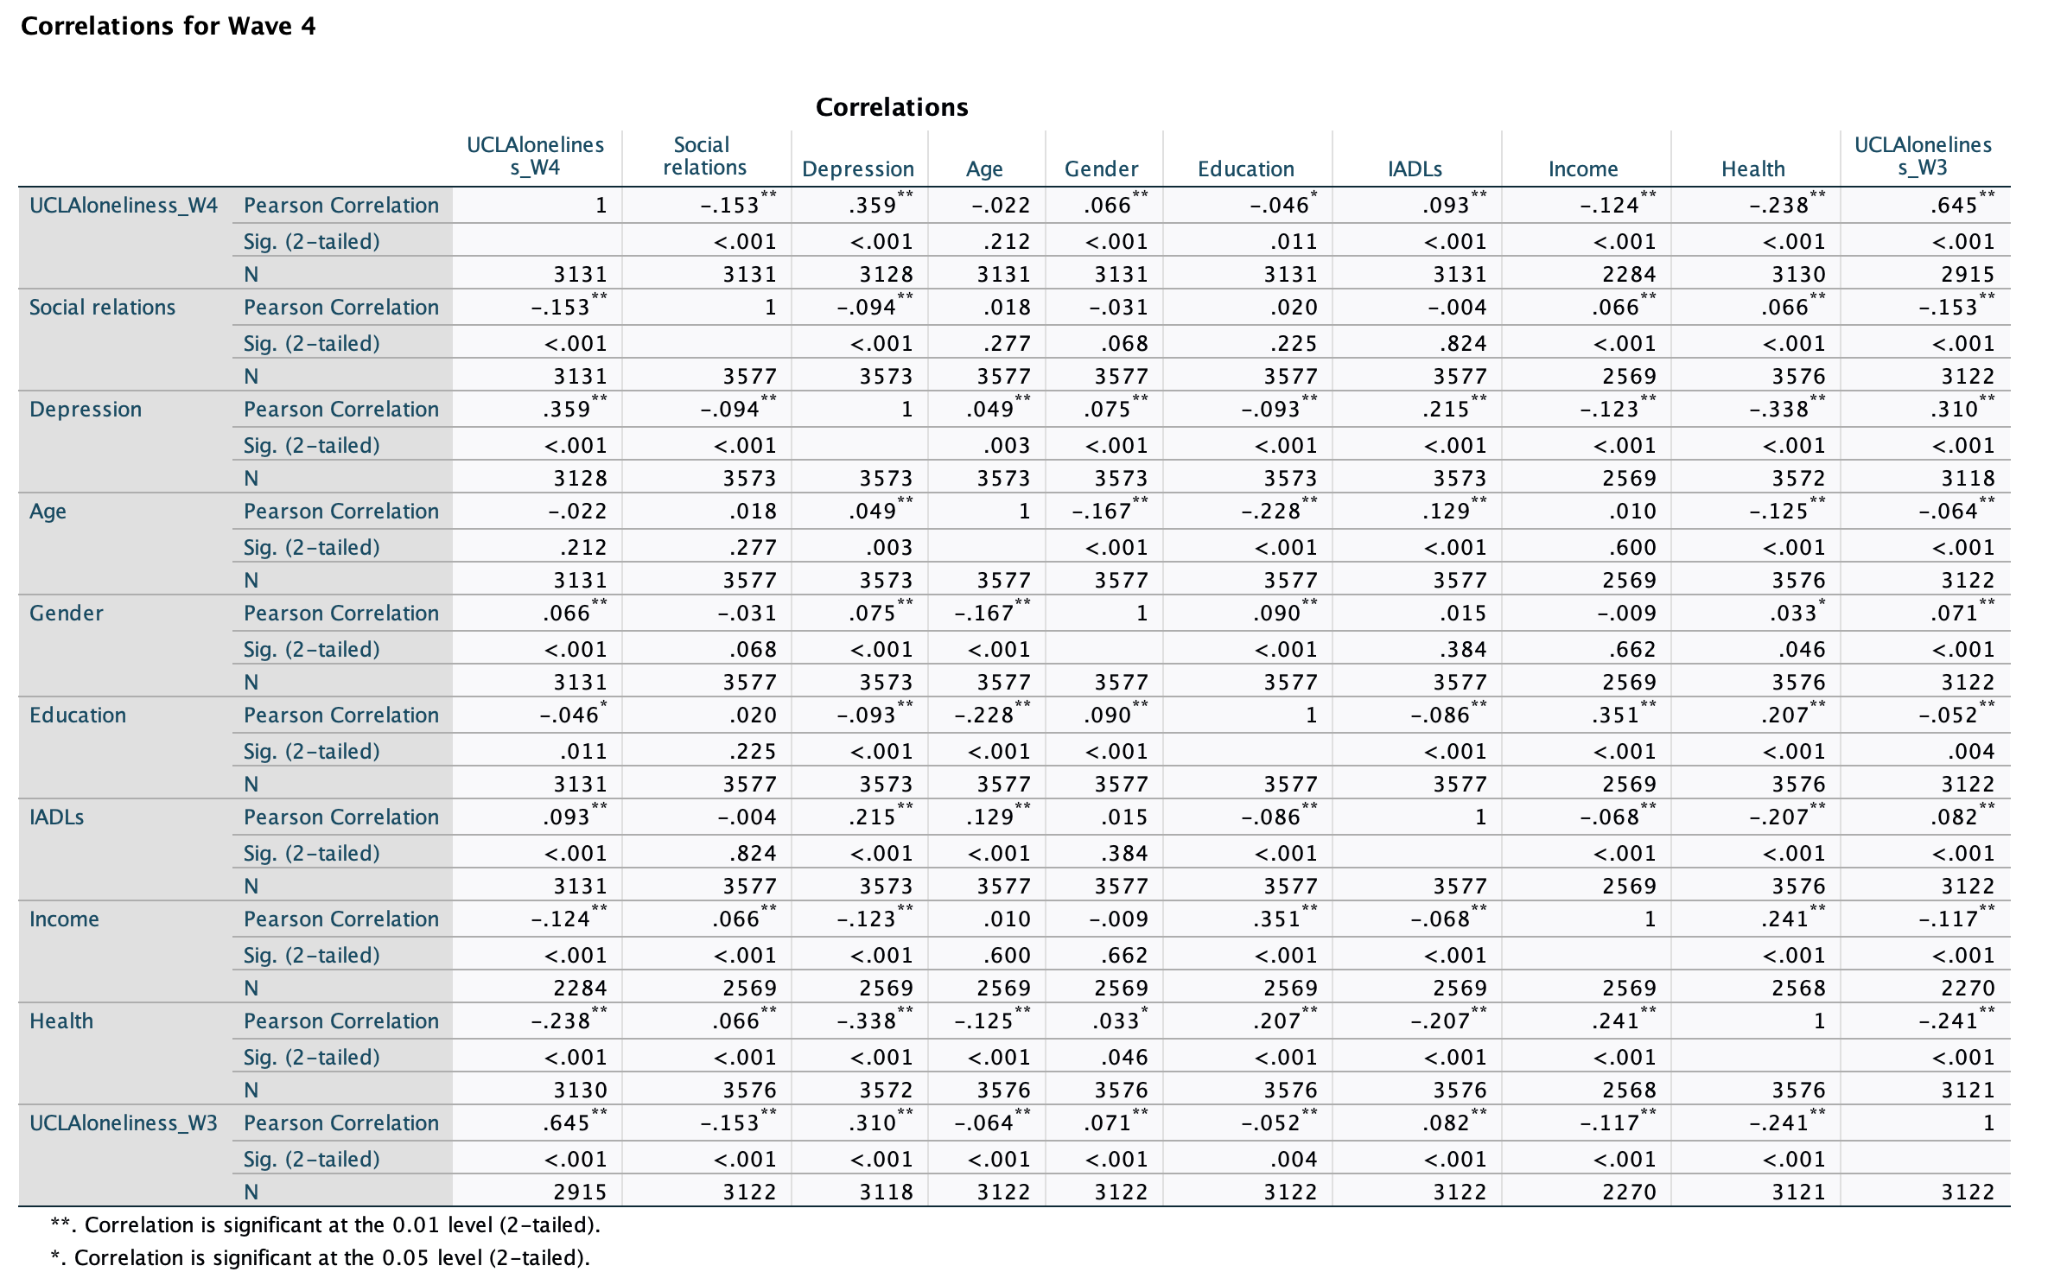


Wave 5 Correlation Table


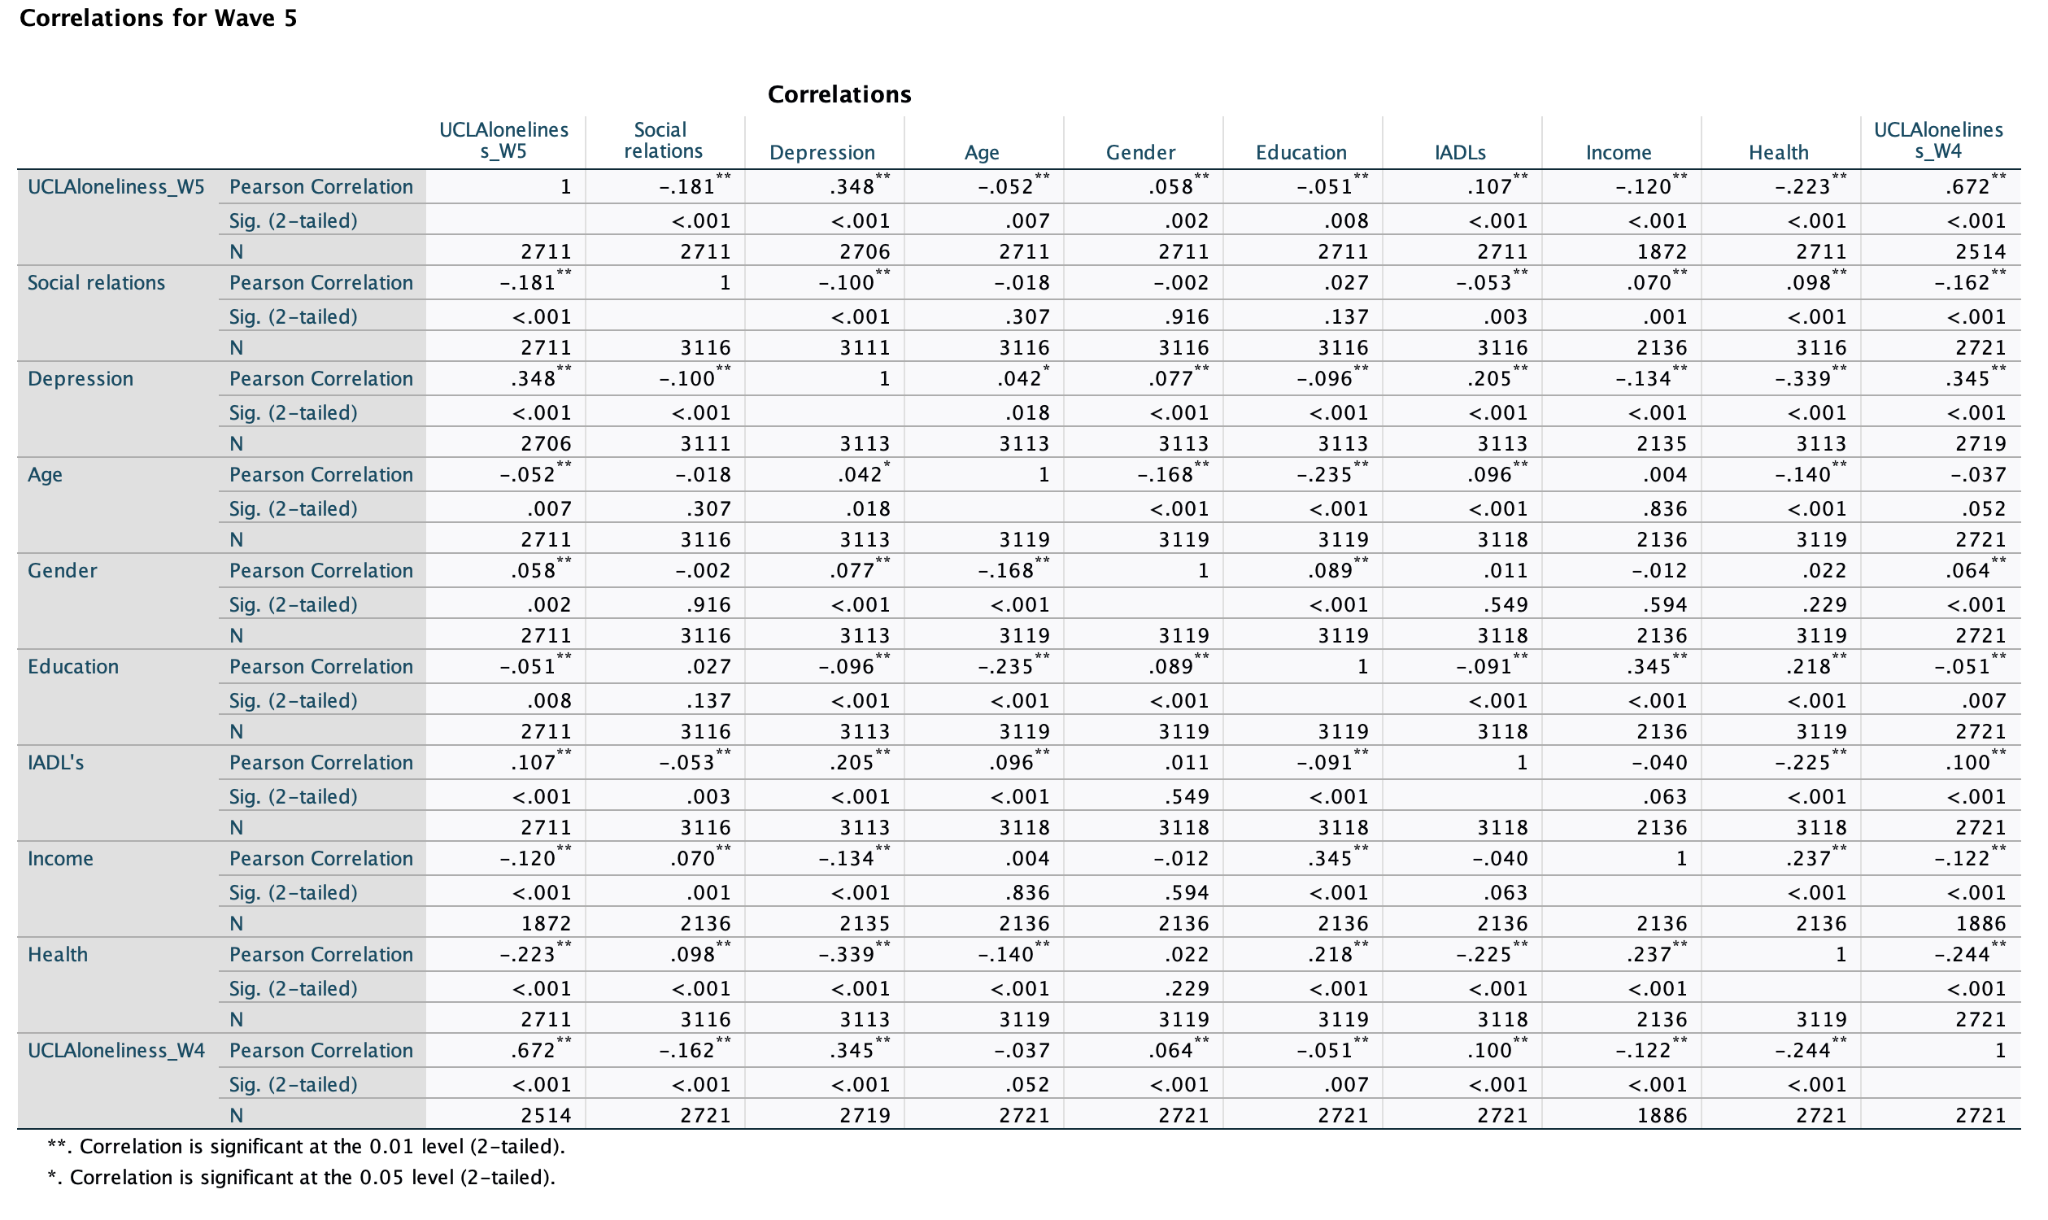


2 Cluster solutions across the 4 waves

Wave 2


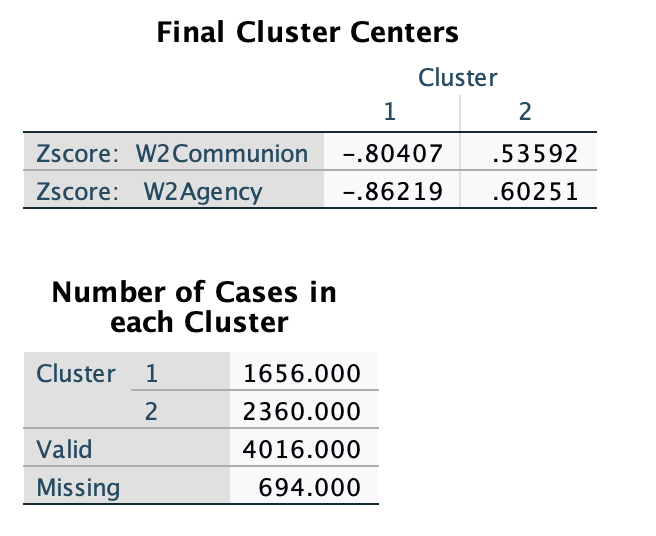


Wave 3


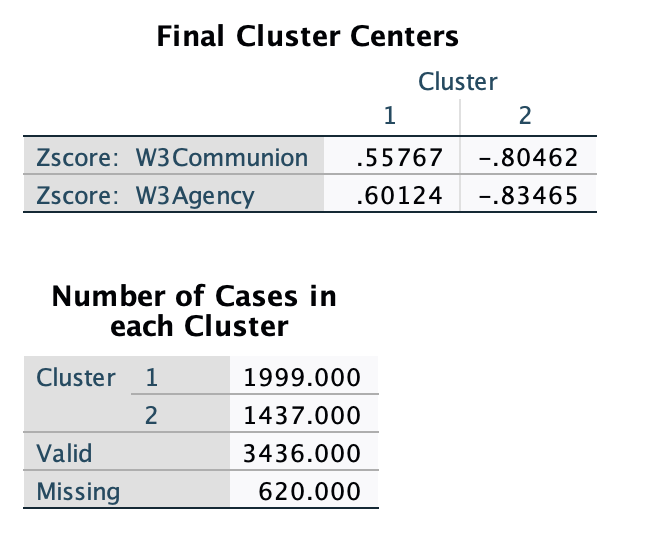


Wave 4


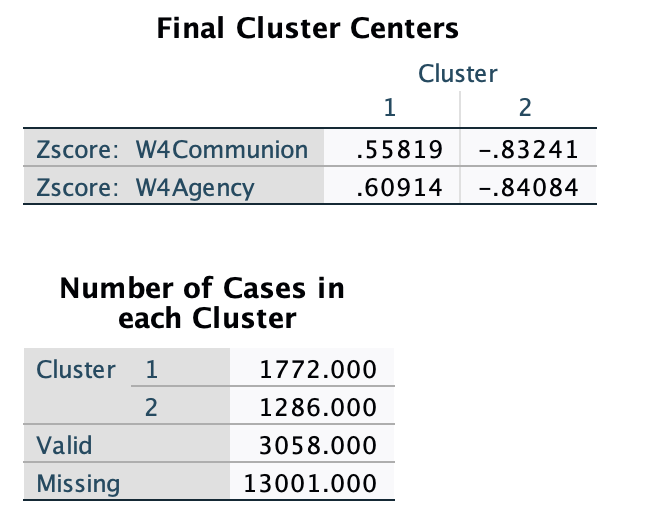


Wave 5


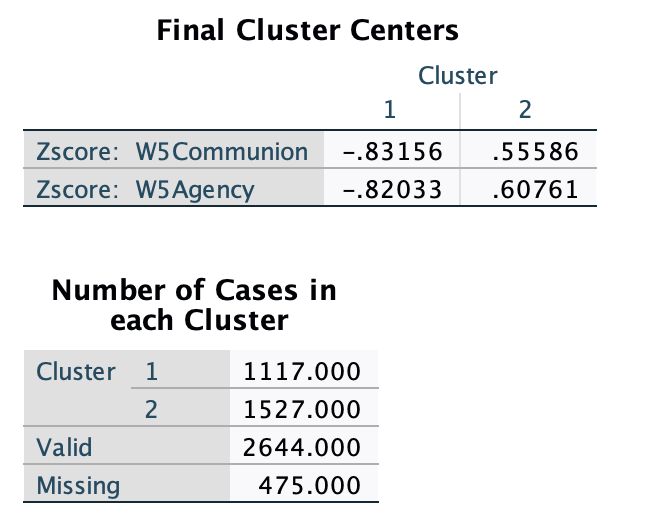


Analyses without covariates (pairwise cluster results)

Overall Wave 2 Effect of Squad on Loneliness Scores (no covariates)
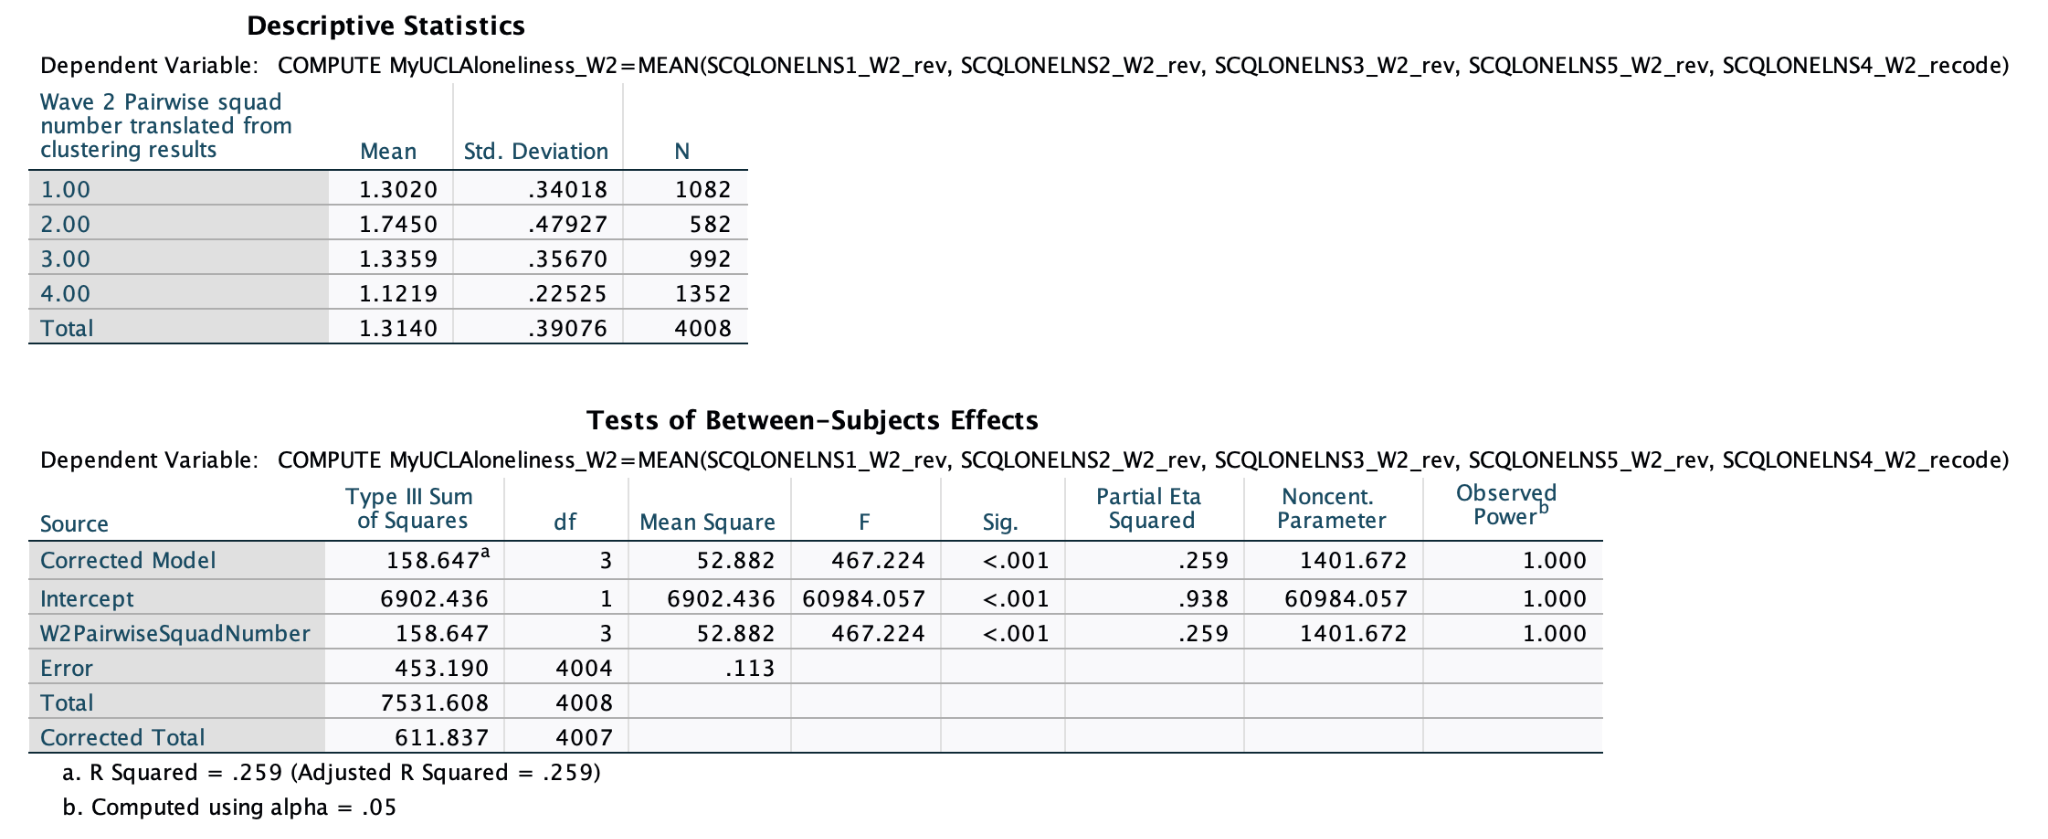


Overall Wave 3 Effect of Squad on Loneliness Scores (no covariates, except for previous

loneliness score)


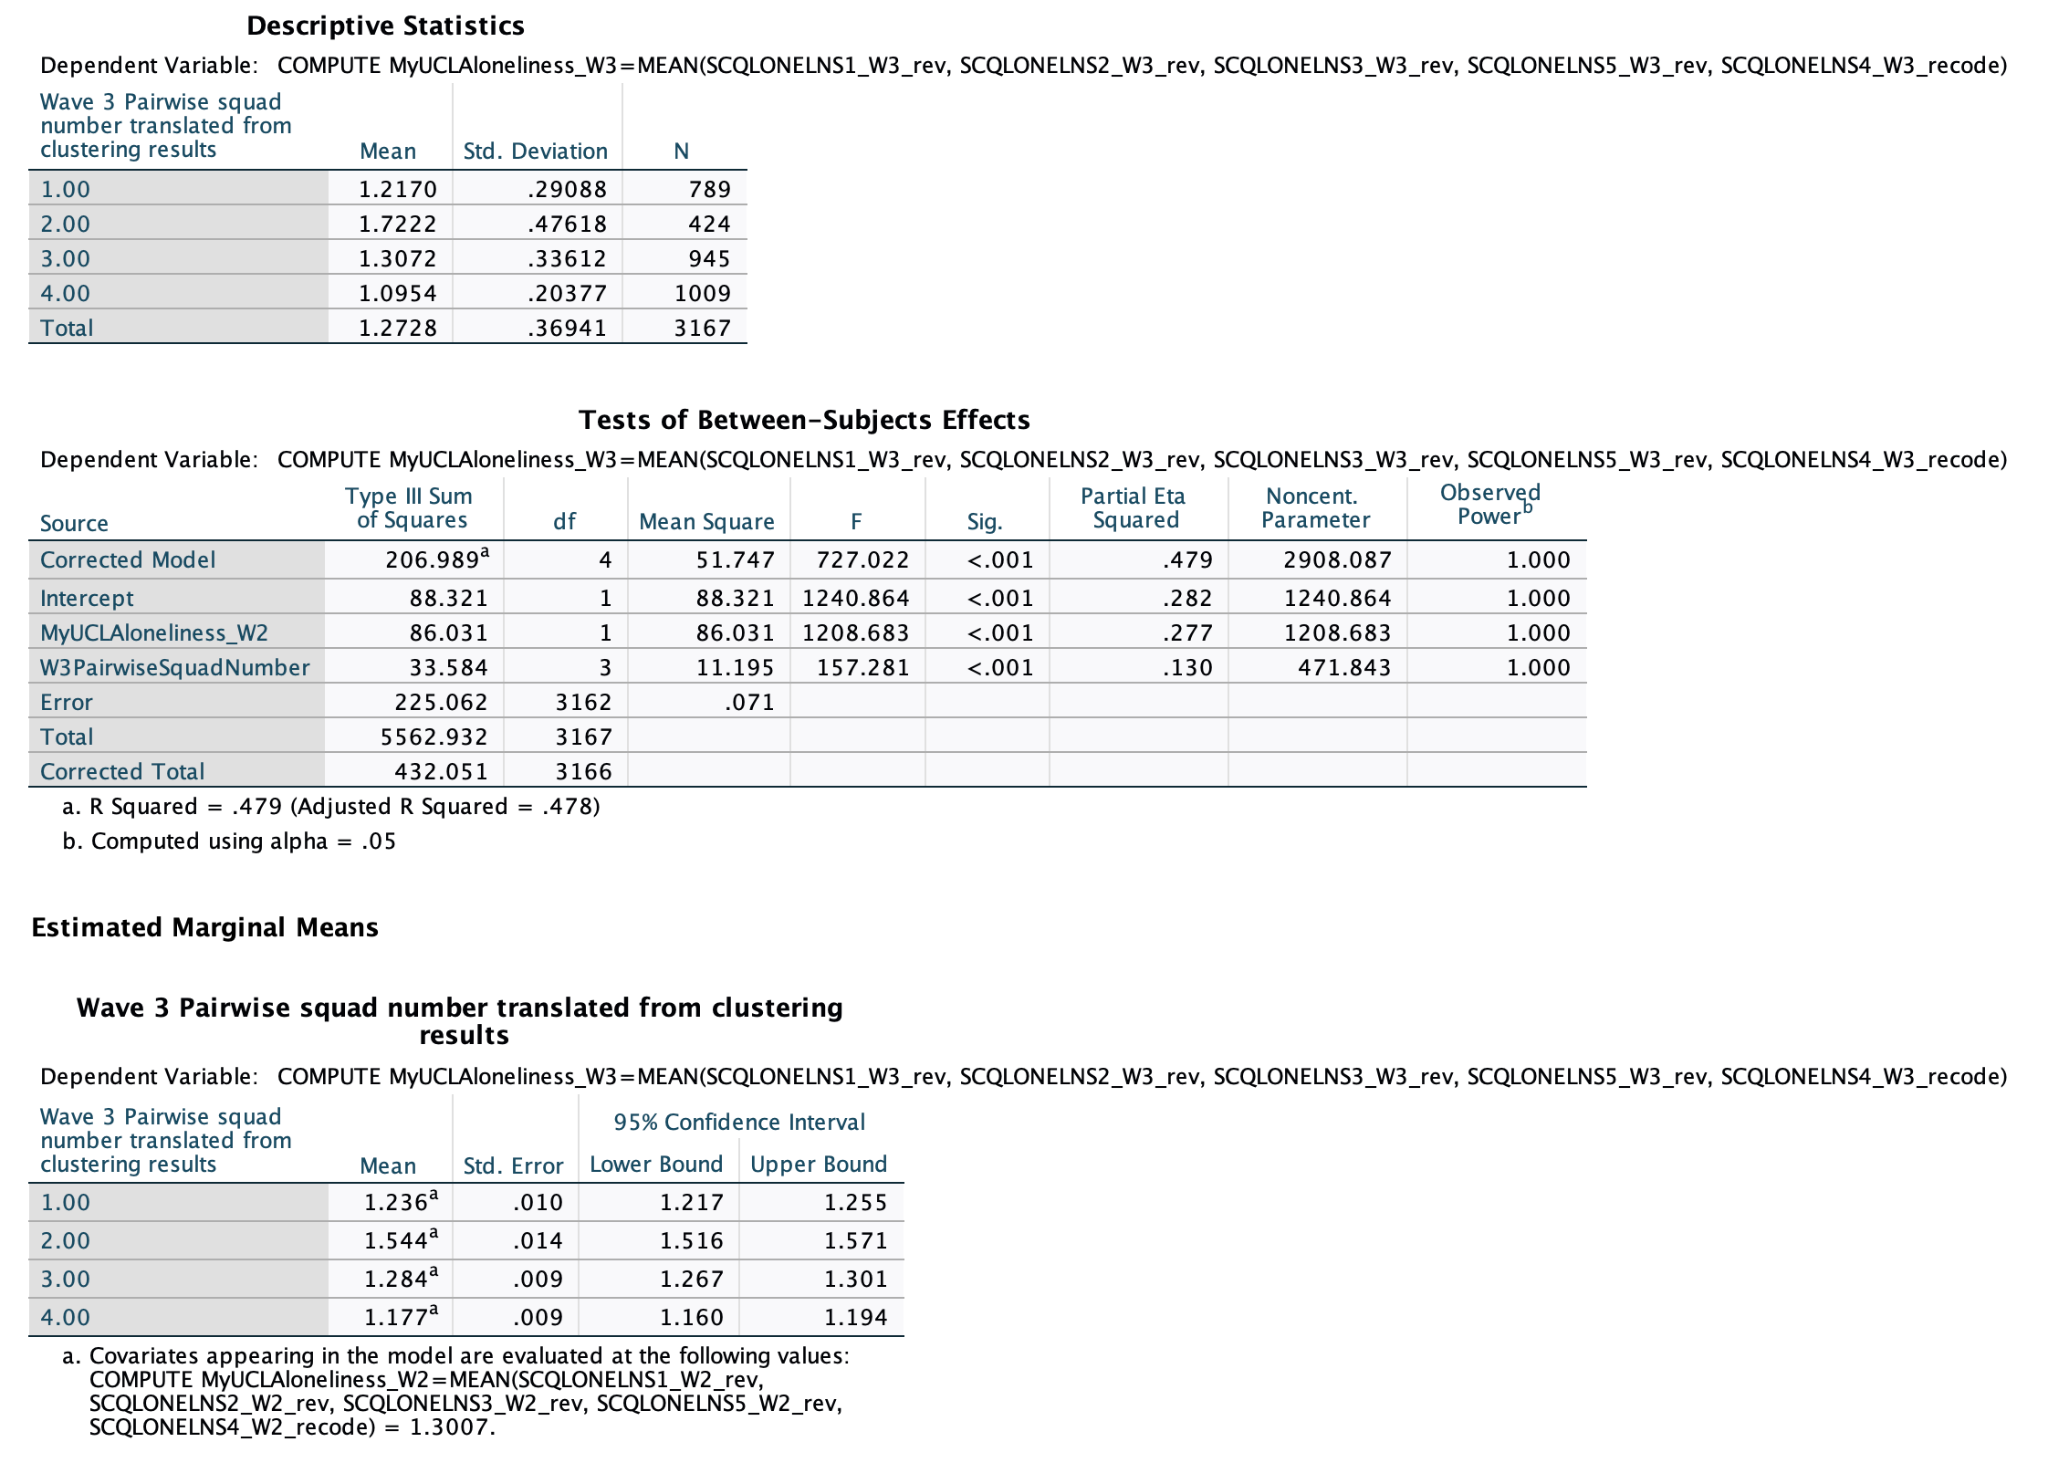


Overall Wave 4 Effect of Squad on Loneliness Scores (no covariates, except for previous

loneliness score)


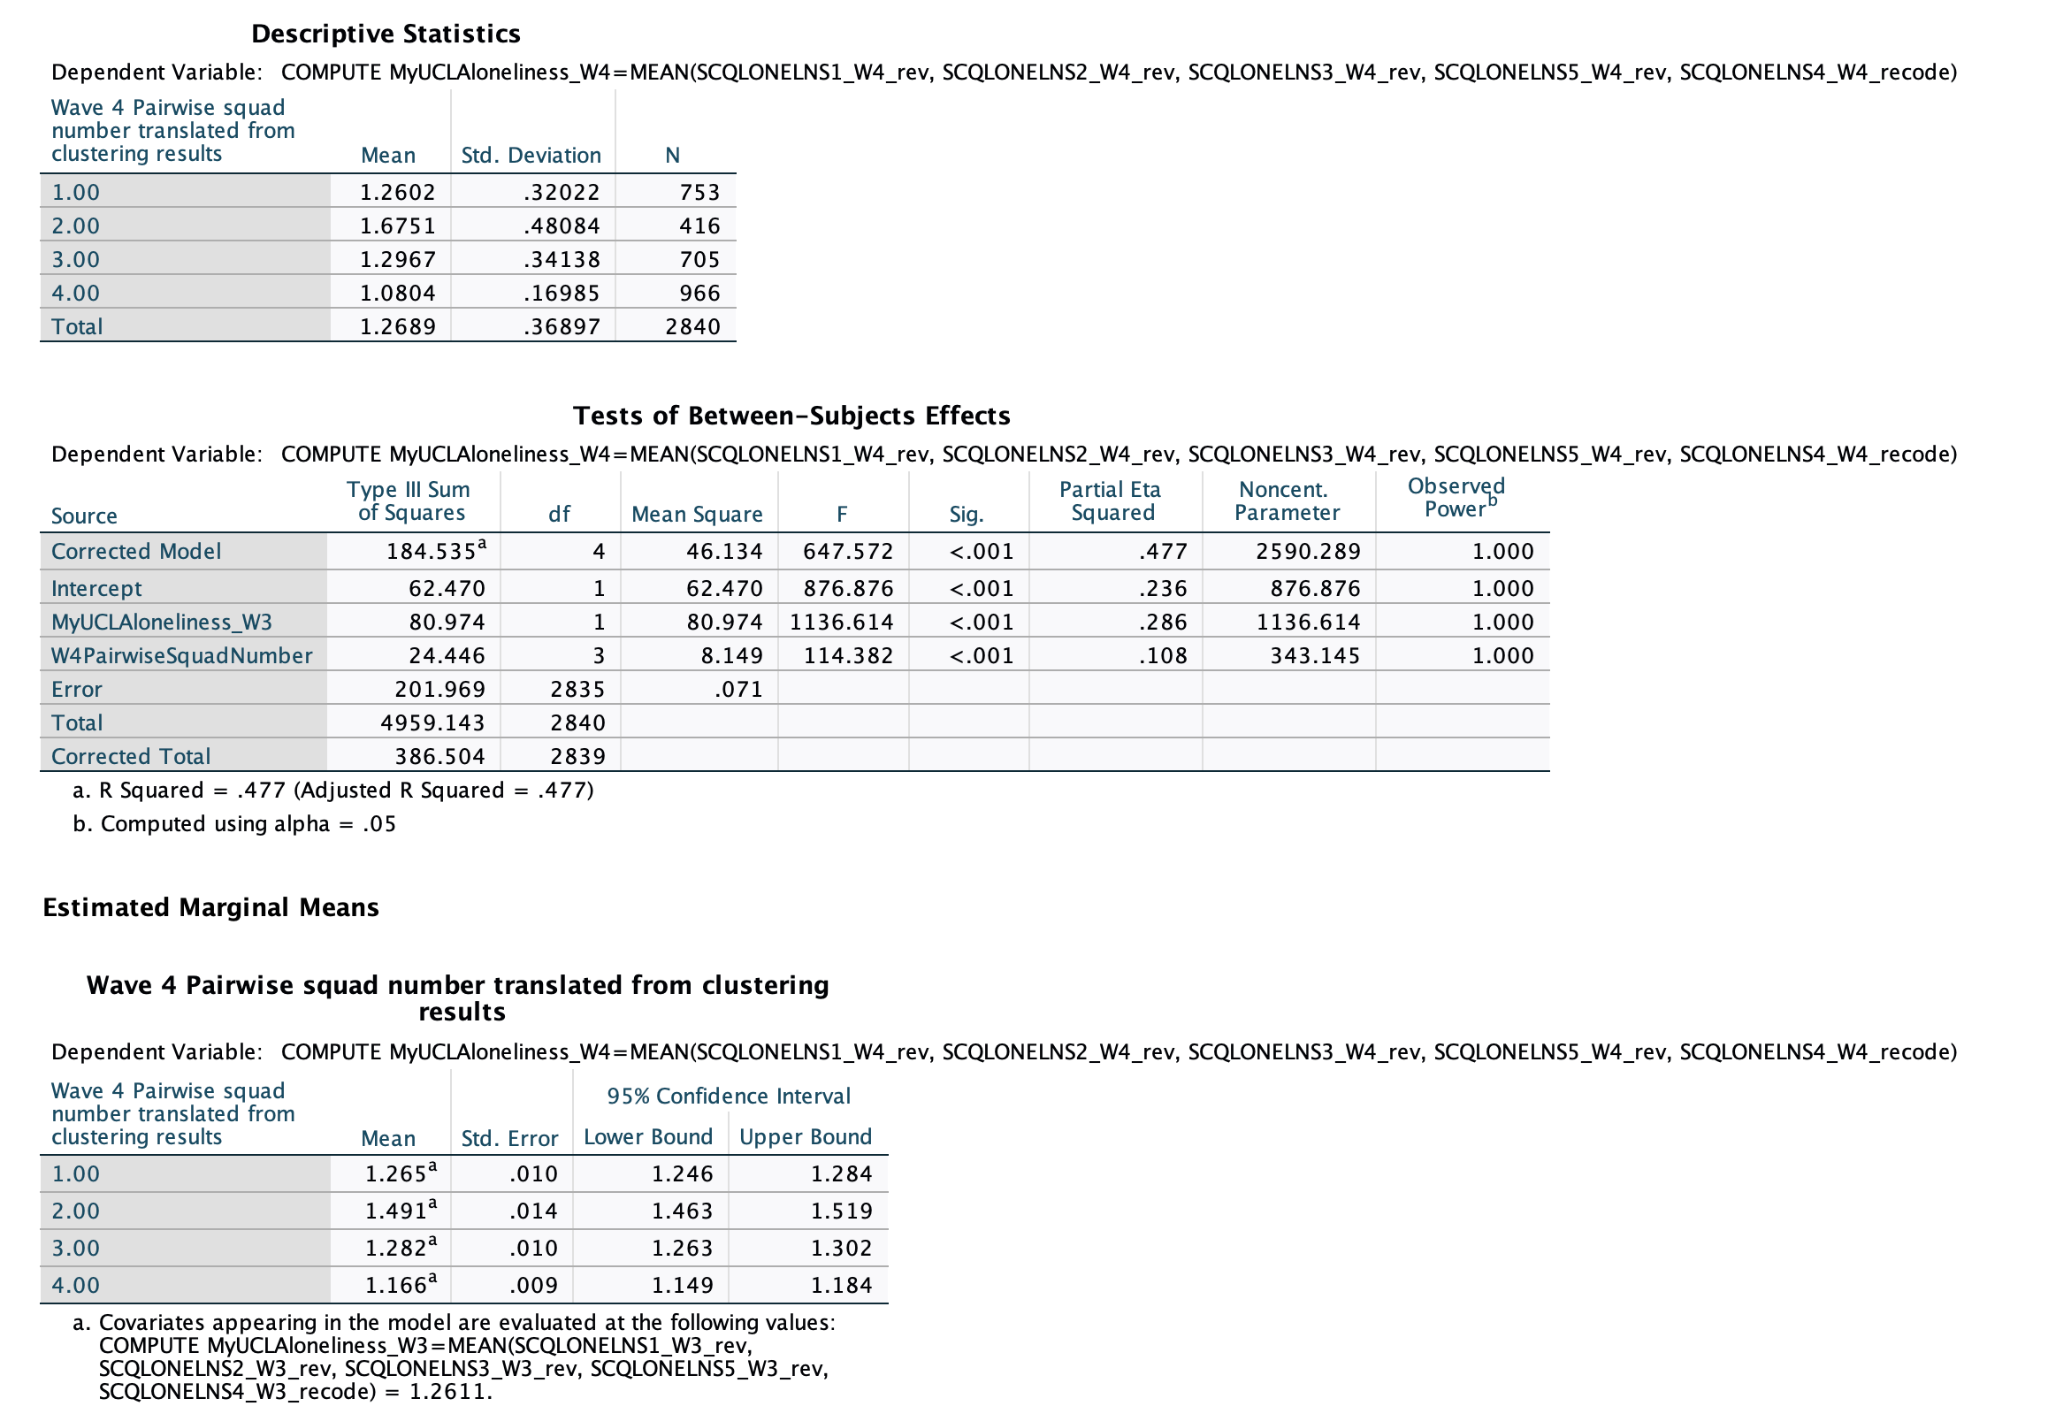


Overall Wave 5 Effect of Squad on Loneliness Scores (no covariates, except for previous

loneliness score)


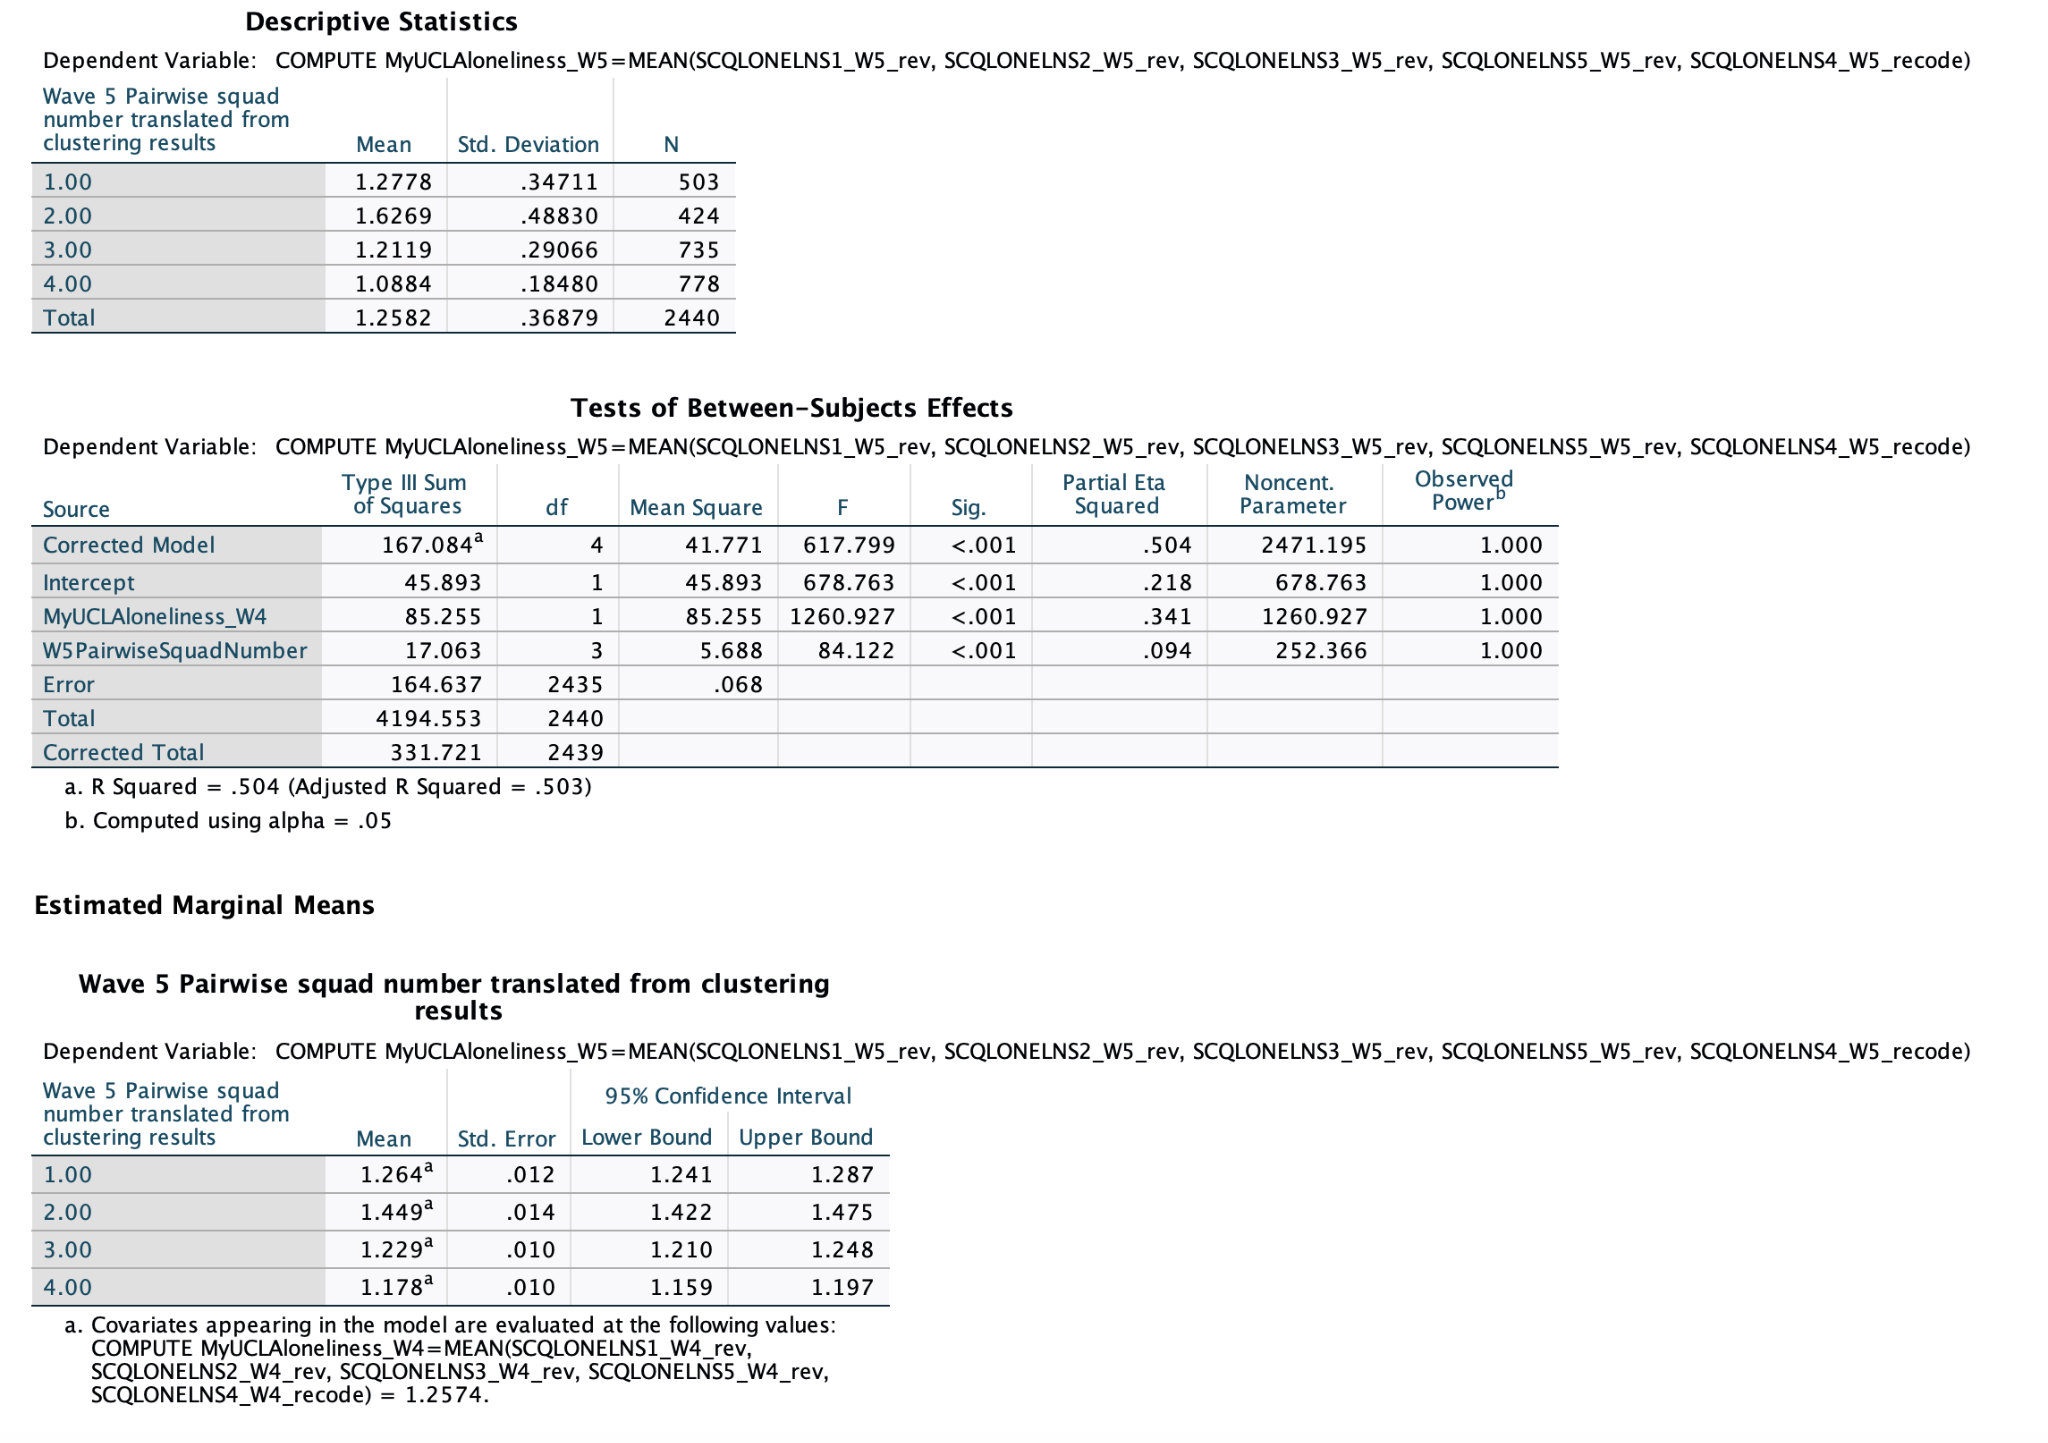


Analysis of Change from Wave 2 to Wave 3 (first set of assumptions; no covariates,

except for previous loneliness score)


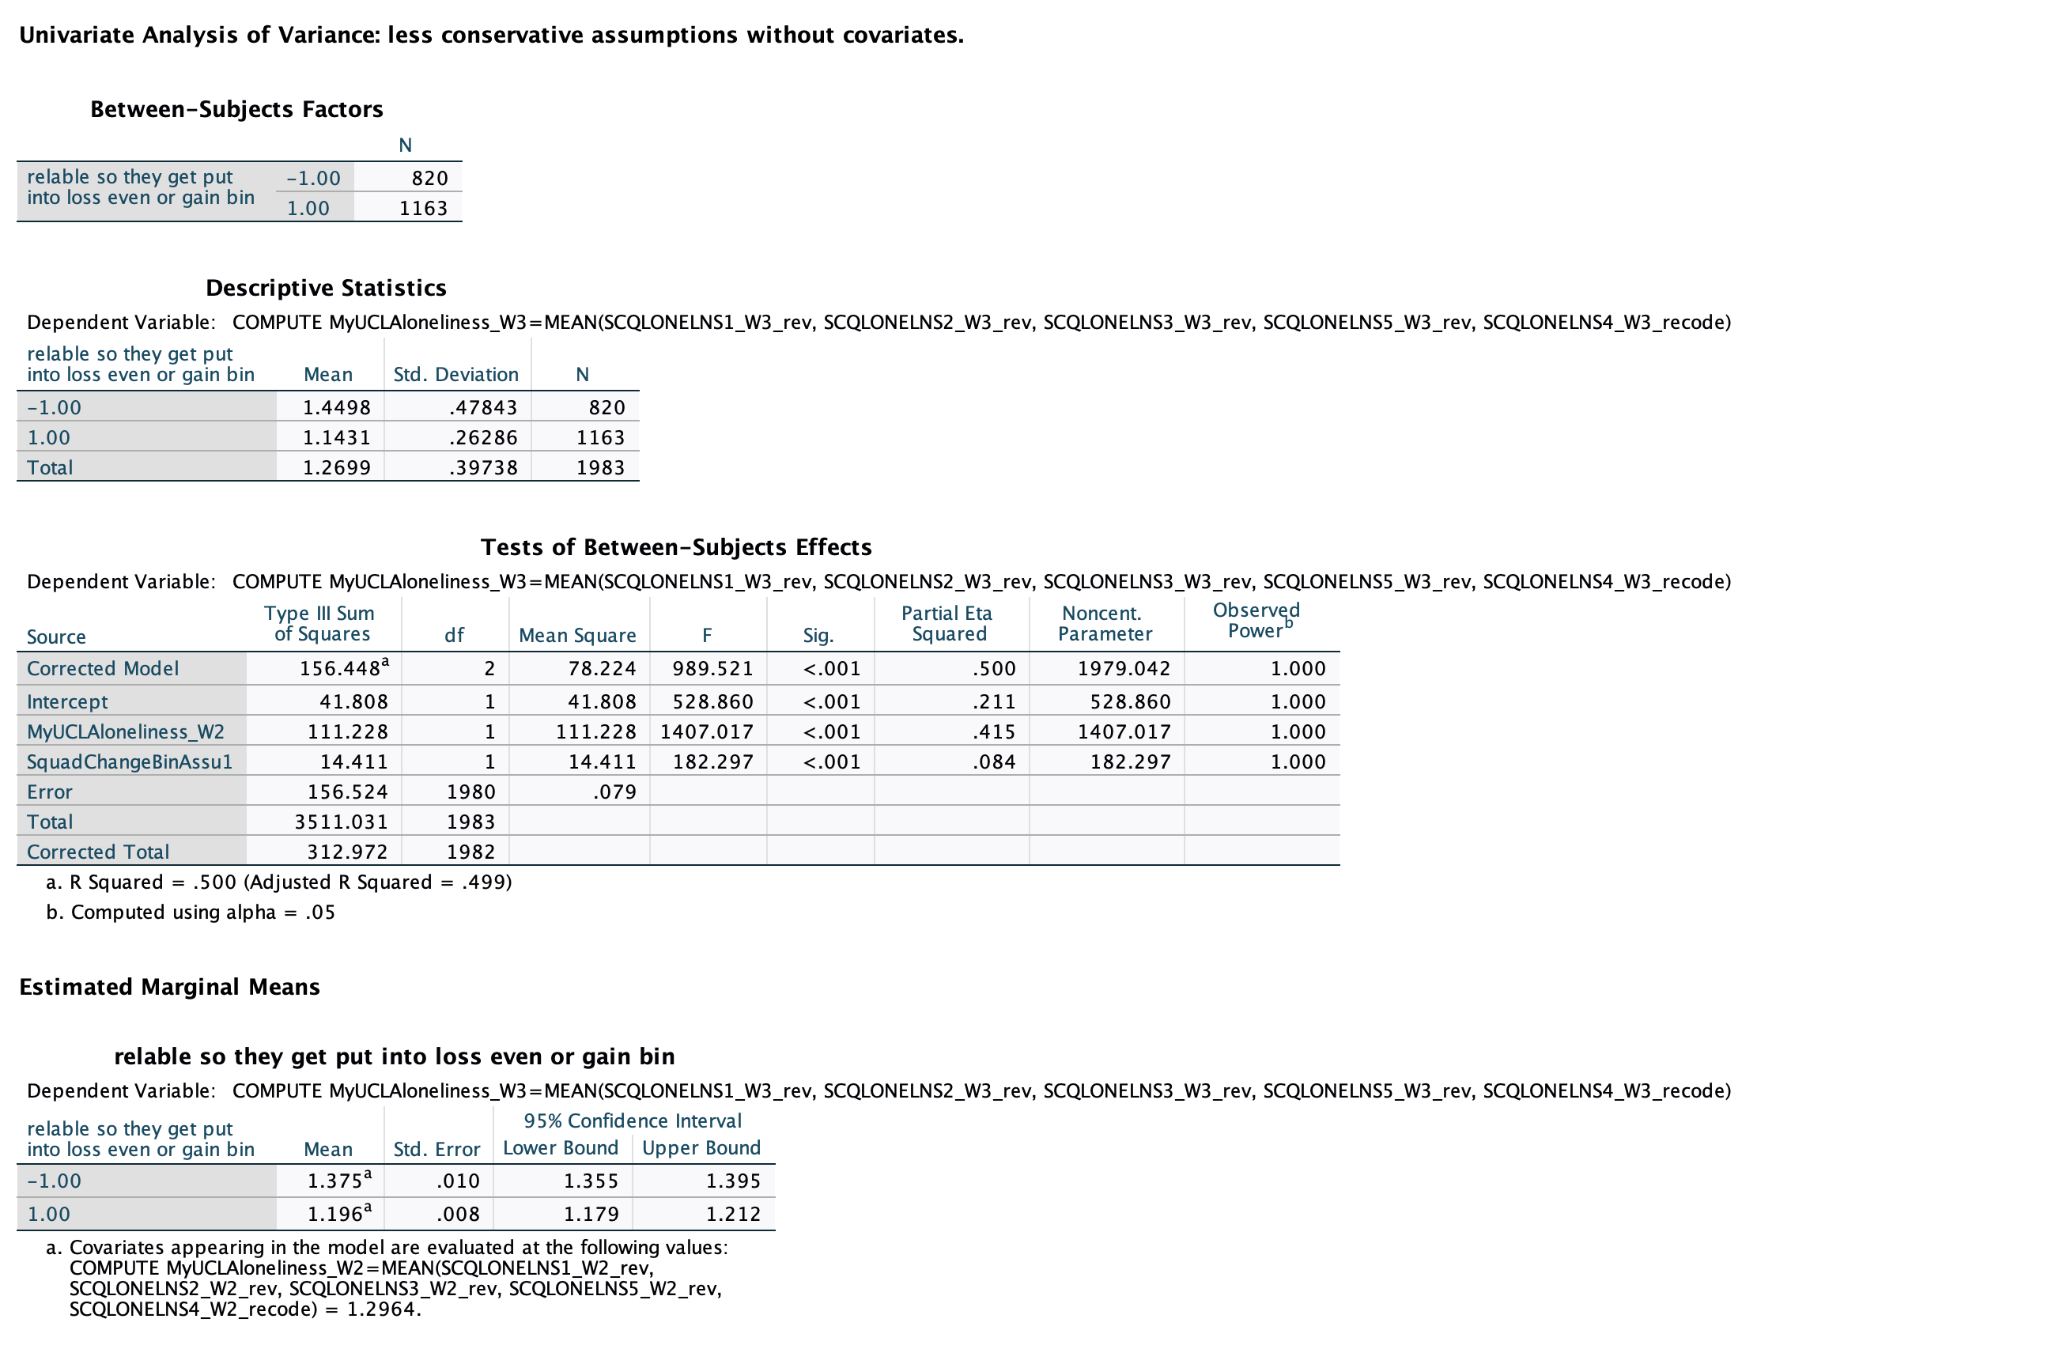


Note: -1 condition refers to individuals who ended up in the more unfavorable cluster or squad; +1 are individuals who ended up in the more favorable squad.

Analysis of Change from Wave 2 to Wave 3 (second set of assumptions; no covariates,

except for previous loneliness score)


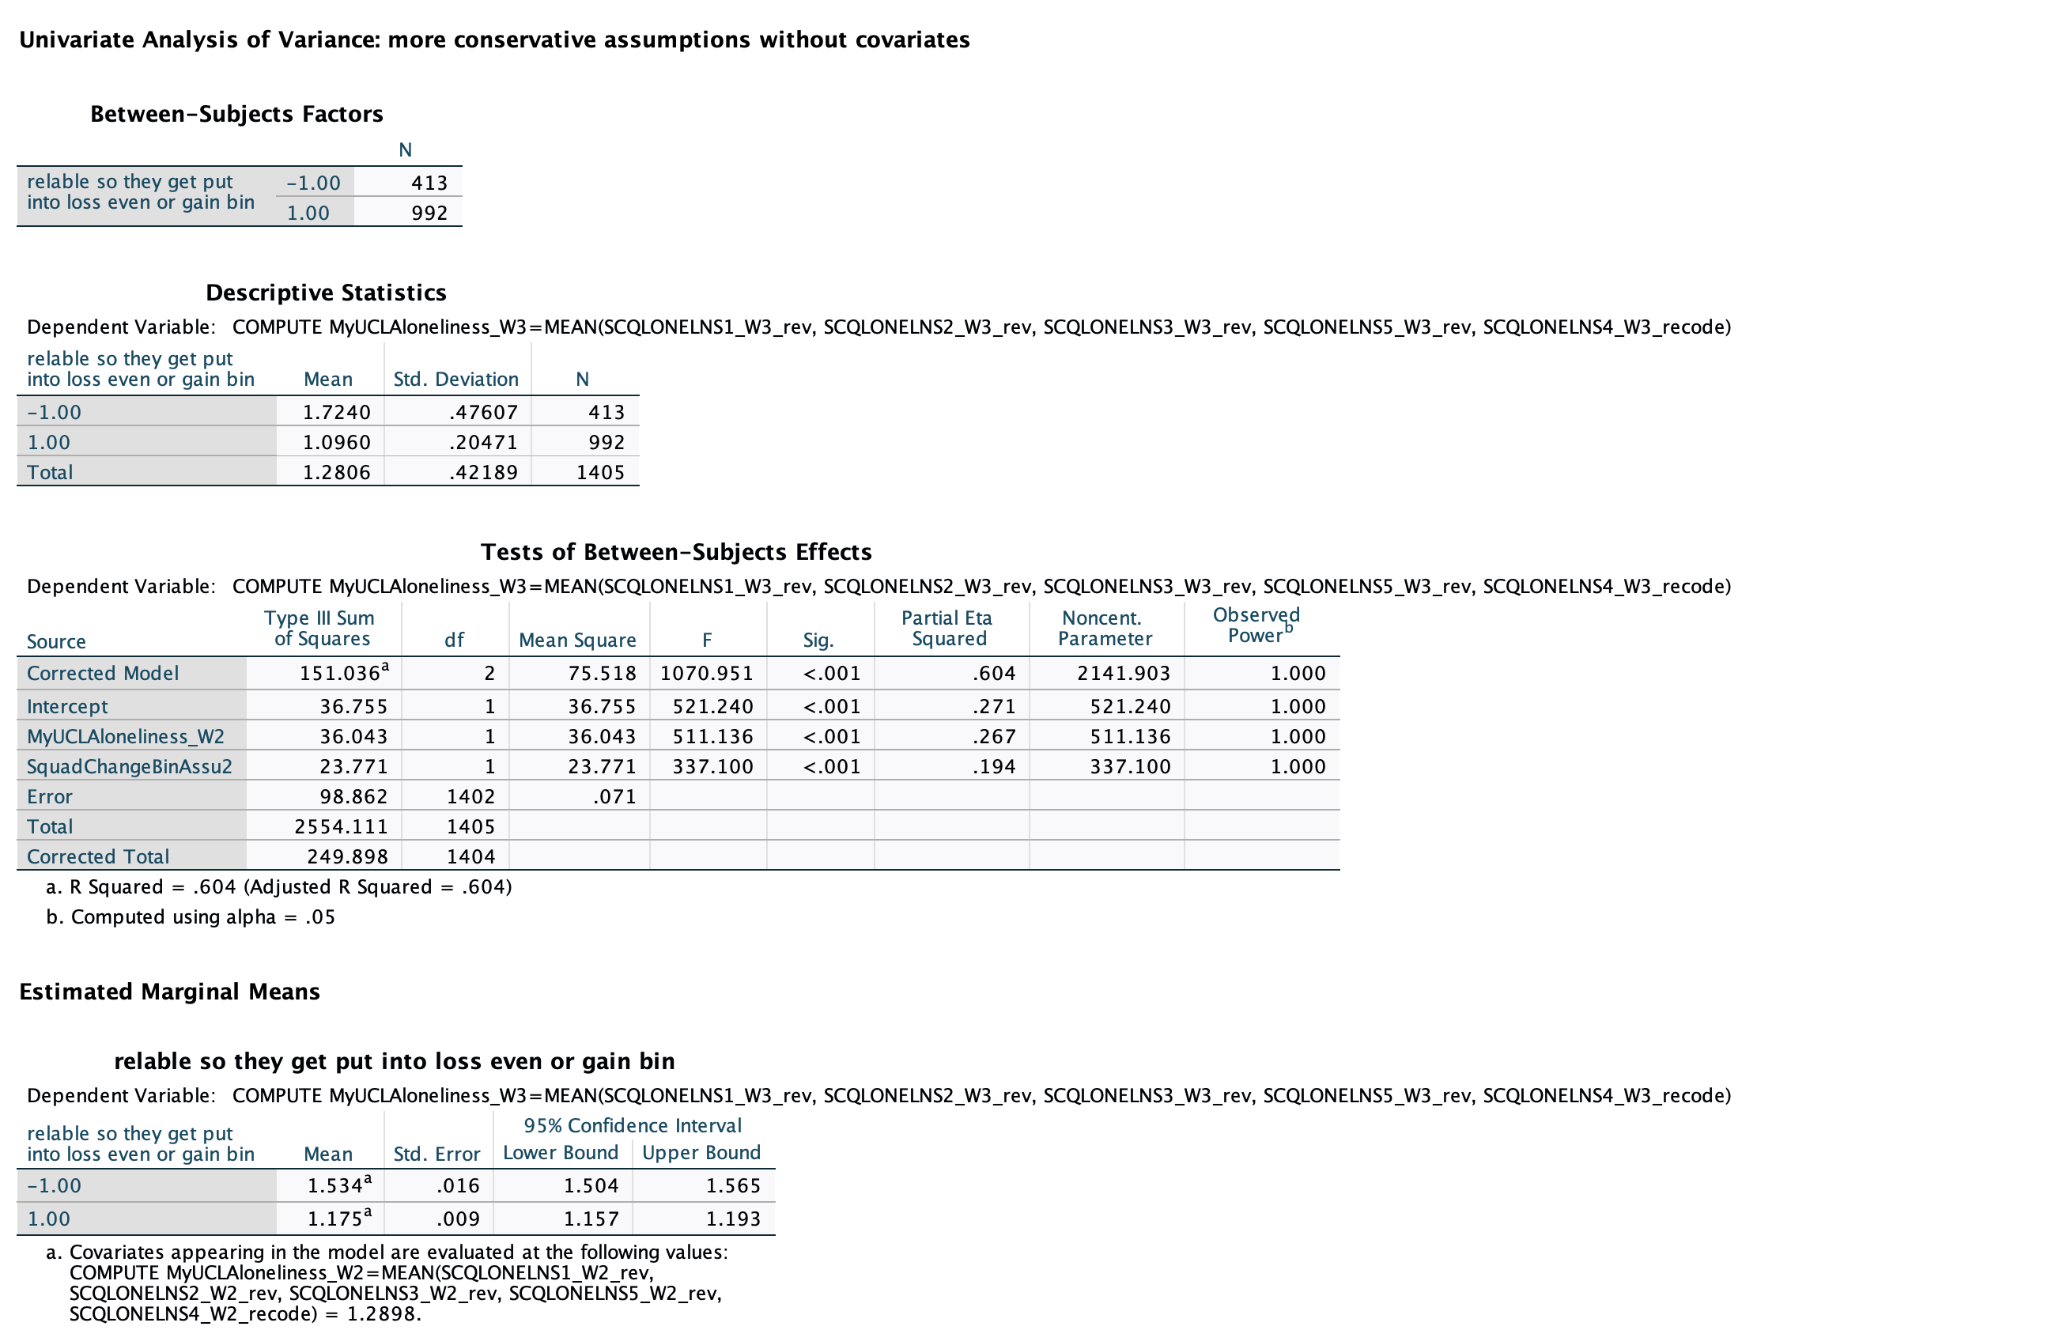


Note: -1 condition refers to individuals who ended up in the more unfavorable cluster or squad; +1 are individuals who ended up in the more favorable squad.

Analysis of Change from Wave 3 to Wave 4 (first set of assumptions; no covariates,

except for previous loneliness score)


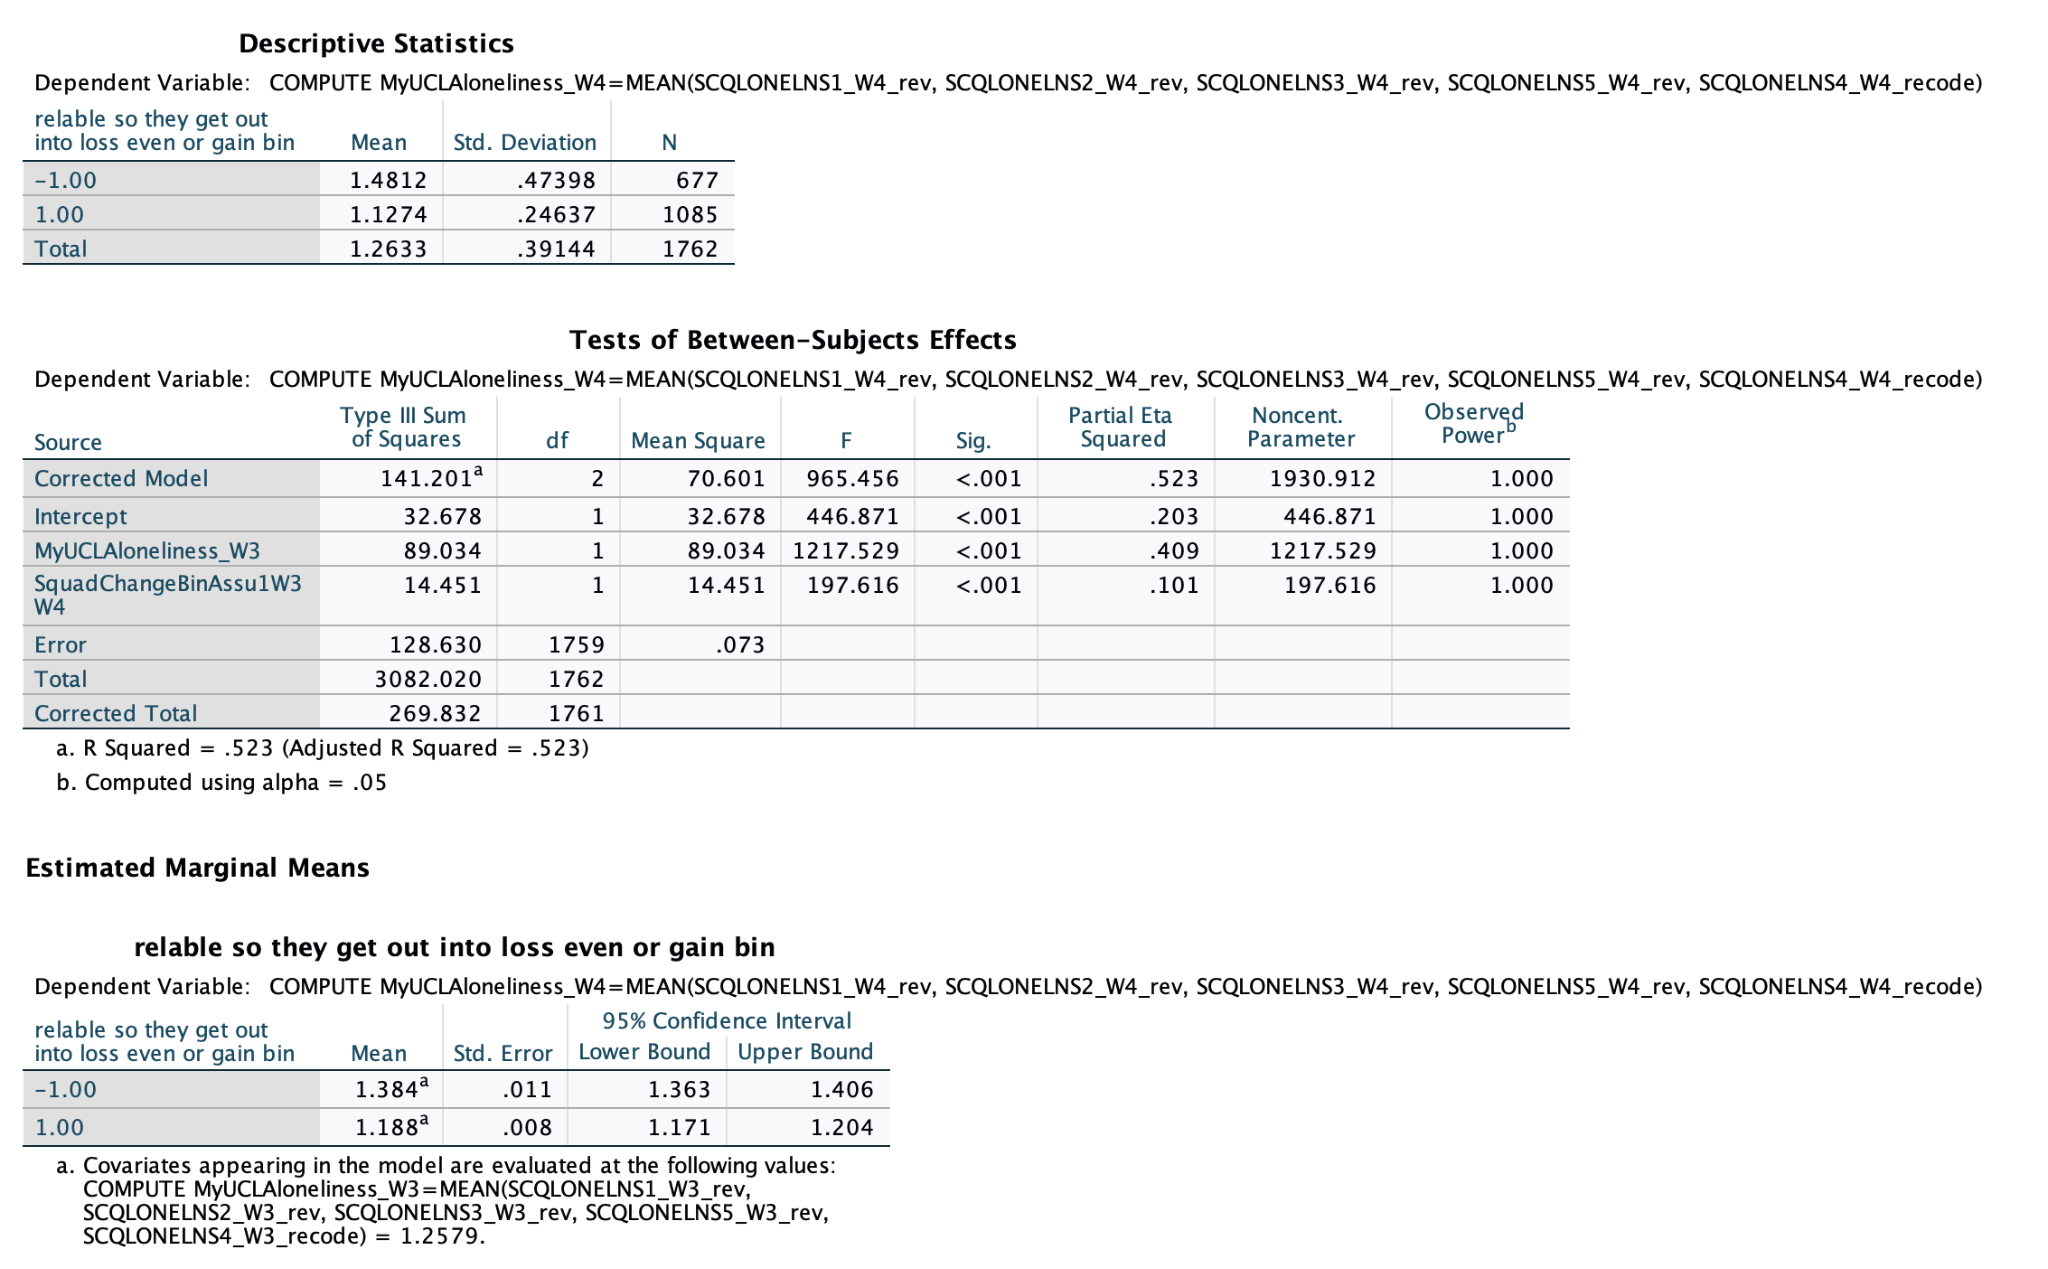


Note: -1 condition refers to individuals who ended up in the more unfavorable cluster or squad; +1 are individuals who ended up in the more favorable squad.

Analysis of Change from Wave 3 to Wave 4 (second set of assumptions; no covariates,

except for previous loneliness score)


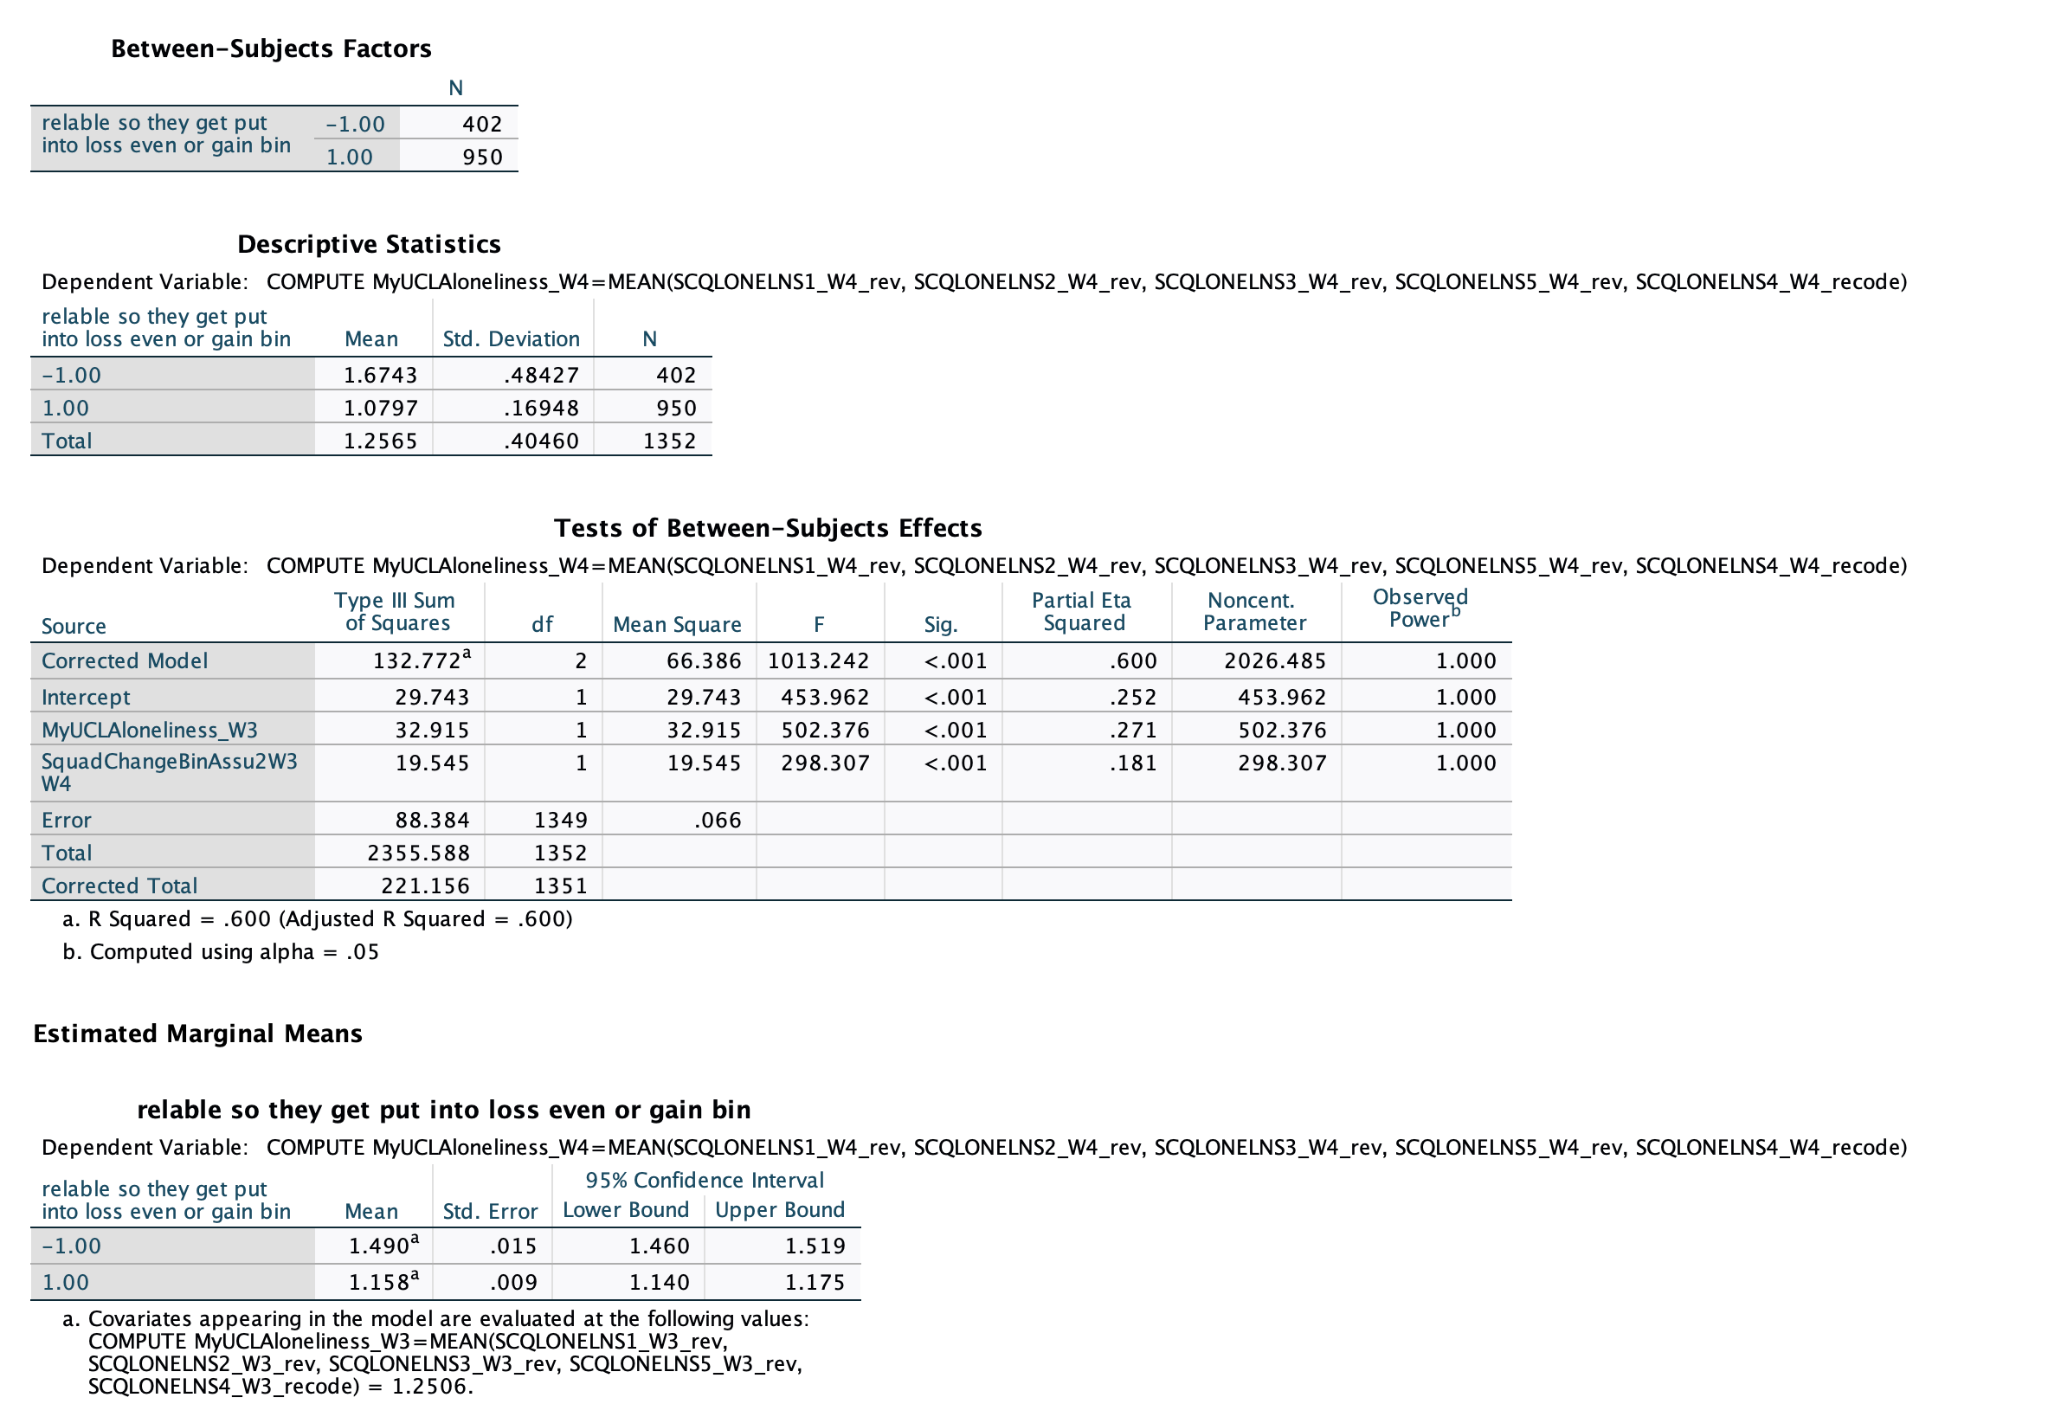


Note: -1 condition refers to individuals who ended up in the more unfavorable cluster or squad; +1 are individuals who ended up in the more favorable squad.

Analysis of Change from Wave 4 to Wave 5 (first set of assumptions; no covariates,

except for previous loneliness score)


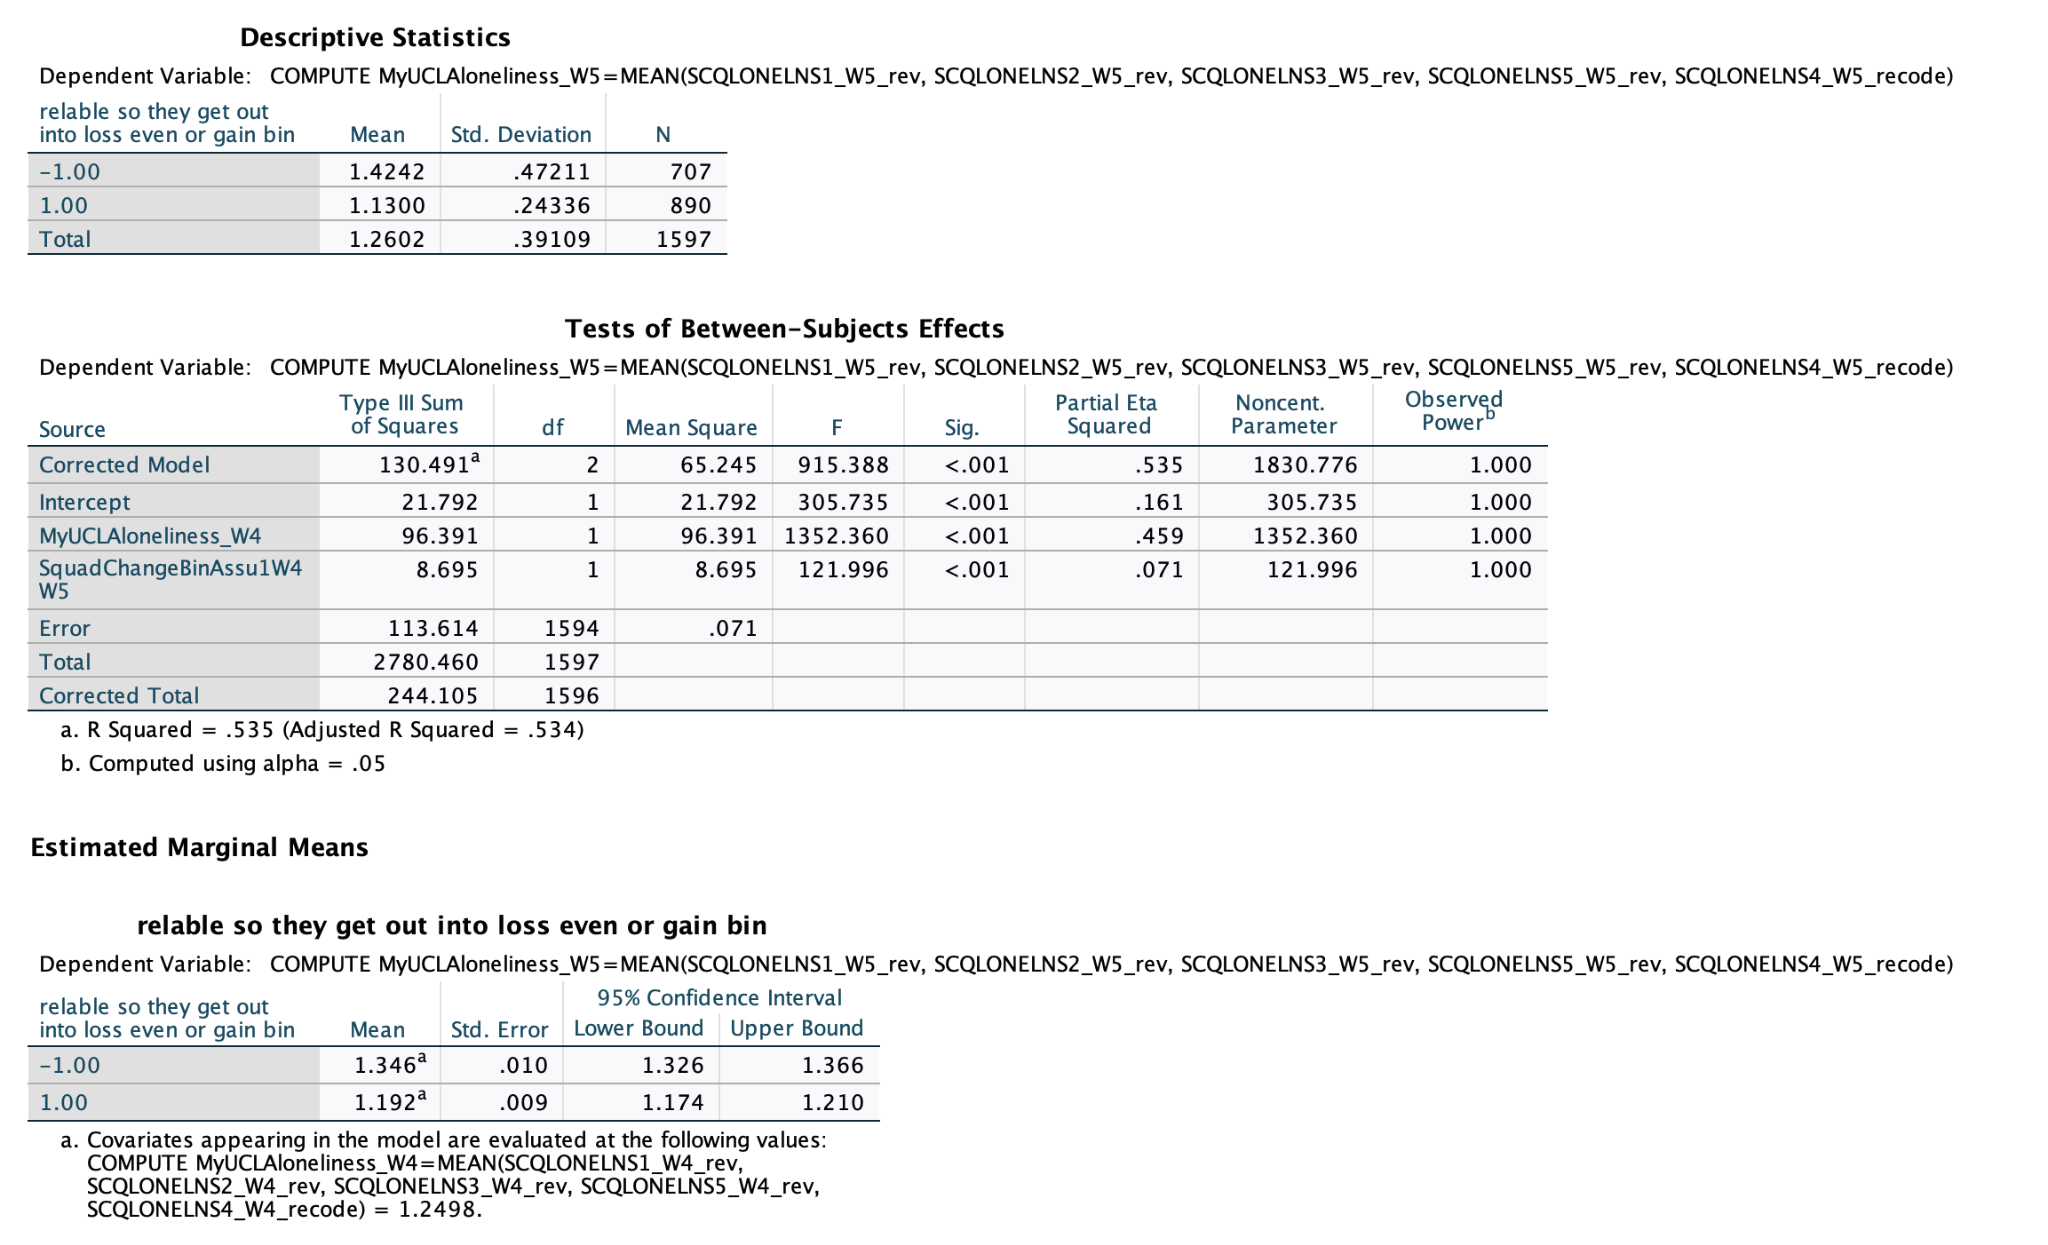


Note: -1 condition refers to individuals who ended up in the more unfavorable cluster or squad; +1 are individuals who ended up in the more favorable squad.

Analysis of Change from Wave 4 to Wave 5 (second set of assumptions; no covariates,

except for previous loneliness score)


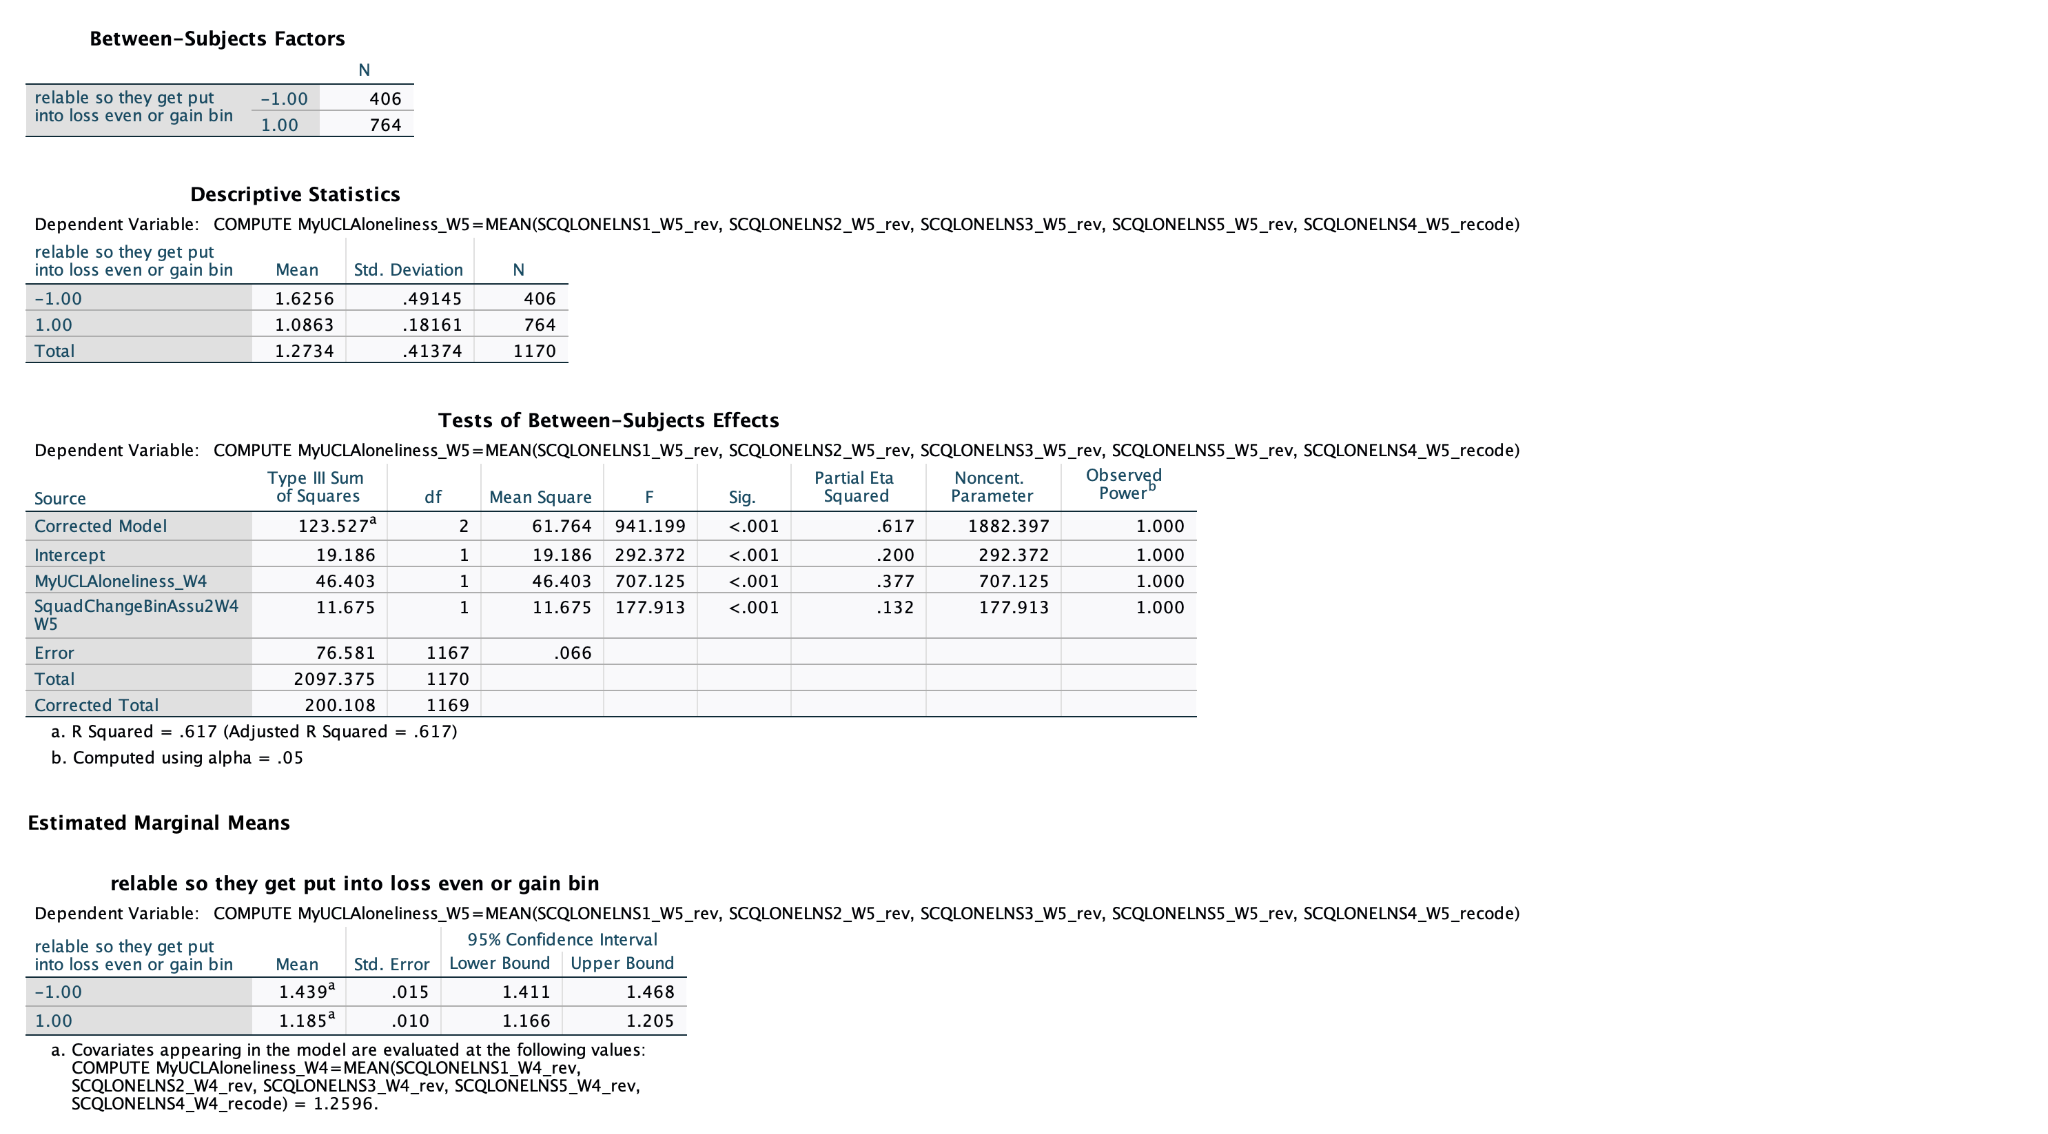


Note: -1 condition refers to individuals who ended up in the more unfavorable cluster or squad; +1 are individuals who ended up in the more favorable squad.
